# Supplementary material for: Intramolecular assembly of dinitromethyl and bistetrazole: a strategy for constructing advanced and environmentally friendly high-energy density materials
Source: Royal Society of Chemistry journal article supplement (doi:10.1039/d4ta03537b), 2024-01-01
Supplement: d4ta03537b1.pdf [file d4ta03537b1.pdf]

## *Journal of Materials Chemistry A*

Supporting Information (SI)

### Intramolecular assembly of dinitromethyl and bistetrazole: A strategy for constructing advanced and environmentally friendly high-energy density materials.

*Xuezhi Yu<sup>a</sup>, Jie Tang<sup>a</sup>, Caijin Lei<sup>a</sup>, Chungui Xue<sup>a</sup>, Guangbin Cheng<sup>\*a</sup>, Chuan Xiao<sup>\*b</sup>  
and Hongwei Yang<sup>\*a</sup>*

a. School of Chemical Engineering, Nanjing University of Science and Technology, Xiaolingwei 200, Nanjing, Jiangsu, China. E-mail: [hyang@mail.njust.edu.cn](mailto:hyang@mail.njust.edu.cn); [gcheng@mail.njust.edu.cn](mailto:gcheng@mail.njust.edu.cn).

b. China Northern Industries Group Co., Ltd. (NORINCO GROUP), Beijing 100089, P. R. China. E-mail: [47785121@qq.com](mailto:47785121@qq.com).

\* . Corresponding authors.

# Content

|                                                                                          |    |
|------------------------------------------------------------------------------------------|----|
| 1. Experimental .....                                                                    | 3  |
| 2. General Methods .....                                                                 | 7  |
| 3. References .....                                                                      | 42 |
| 4. $^1\text{H}$ and $^{13}\text{C}$ NMR Spectra of <b>BDNBT</b> and Compounds 1-10 ..... | 43 |

# 1. Experimental

## 1.1 Safety precautions

Warning! All new compounds involved are potential explosives with a risk of explosion. Avoid mechanical impacts and electrostatic friction during experiments. The use of full protective equipment by laboratory staff is strongly recommended.

## 1.2 Synthesis of 1,1'-(1*H*,2'*H*-[5,5'-bistetrazole]-1,2'-diyl)bis(propan-2-one) (**1**) and 1,1'-(2*H*,2'*H*-[5,5'-bistetrazole]-2,2'-diyl)bis(propan-2-one) (**2**)

H<sub>2</sub>BT (1.38 g, 10.0 mmol) was dissolved in an aqueous solution of KOH (1.12 g, 20 mmol, in 30 mL H<sub>2</sub>O), to which was added an acetone solution of bromoacetone (2.72 g, 20 mmol, in 10 mL acetone) and stirred at room temperature for 12 h. The mixture was filtered and the filter cake was washed with acetone, and water and dried to give a white powder solid product **2** (0.8 g, 66%). <sup>1</sup>H NMR (300 MHz, DMSO-*d*<sub>6</sub>): δ = 6.11 (s), 2.33 (s) ppm. <sup>13</sup>C NMR (75 MHz, DMSO-*d*<sub>6</sub>): δ = 199.95, 155.68, 62.02, 27.66 ppm. IR (KBr,  $\nu/\text{cm}^{-1}$ ):  $\nu$  = 1780, 1777, 1424, 1386, 1338, 1276, 1165, 1154, 1107, 1073, 828, 753, 522  $\text{cm}^{-1}$ ; Elemental analysis calcd (%) for C<sub>8</sub>H<sub>10</sub>N<sub>8</sub>O<sub>2</sub> (250.09): C: 38.40, H: 4.03, N: 44.78 %; Found (%): C: 38.68, H: 3.96, N: 44.95 %.

The filtrate was concentrated to about 10 mL by spinning under reduced pressure, filtered and washed with water to give a soft, glutinous, rice-white solid product **1** (1.60 g, 33%). <sup>1</sup>H NMR (300 MHz, DMSO-*d*<sub>6</sub>): δ = 6.14 (s), 5.99 (s), 2.35 (s), 2.33 (s) ppm. <sup>13</sup>C NMR (75 MHz, DMSO-*d*<sub>6</sub>): δ = 199.99, 199.63, 153.24, 145.77, 62.21, 58.28, 27.66, 27.54 ppm. IR (KBr,  $\nu/\text{cm}^{-1}$ ):  $\nu$  = 1798, 1784, 1389, 1367, 1358, 1344, 1251, 1167, 1152, 1073, 866, 762, 549  $\text{cm}^{-1}$ ; Elemental analysis calcd (%) for C<sub>8</sub>H<sub>10</sub>N<sub>8</sub>O<sub>2</sub> (250.09): C: 38.40, H: 4.03, N: 44.78 %; Found (%): C: 38.20, H: 3.99, N: 44.55 %.

## 1.3 Synthesis of 2,2'-bis(dinitromethyl)-2*H*,2'*H*-5,5'-bistetrazole (BDNBT)

Compound **2** (1.00 g, 4.0 mmol) was slowly added to 4 mL of nitrosulfuric acid (H<sub>2</sub>SO<sub>4</sub>: Fuming HNO<sub>3</sub> = 1:1) at -10 °C for 24 h. The reaction was quenched by pouring the reactants into ice, stirred for 2 h, and filtered to give a white solid product **BDNBT** (0.70 g, 50.6 %). <sup>1</sup>H NMR (300 MHz, DMSO-*d*<sub>6</sub>): δ = 9.57 (s) ppm. <sup>13</sup>C

NMR (75 MHz, DMSO- $d_6$ ):  $\delta$  = 155.72, 131.03 ppm. IR (KBr,  $\nu/cm^{-1}$ ):  $\nu$  = 1814, 1810, 1792, 1789, 1462, 1397, 1337, 1299, 1048, 783, 774, 744  $cm^{-1}$ ; Elemental analysis calcd (%) for  $C_4H_2N_{12}O_8$  (346.01): C: 13.88, H: 0.58, N: 48.56 %; Found (%): C: 14.03, H: 0.62, N: 48.48 %.

#### 1.4 Synthesis of Sodium (2*H*,2'*H*-[5,5'-bistetrazole]-2,2'-diylbis(dinitromethanide)) (4)

**BDNBT** (1.00 g, 2.9 mmol) was added to acetonitrile and stirred, to which a few drops of NaOH saturated solution was added dropwise, stirred for 1h, and filtered to give the light green solid **4** (0.90 g, 79.3 %).  $^{13}C$  NMR (75 MHz, DMSO- $d_6$ ):  $\delta$  = 155.72, 131.05 ppm. IR (KBr,  $\nu/cm^{-1}$ ):  $\nu$  = 1855, 1786, 1732, 1702, 1625, 1348, 1265, 1244, 1027, 948, 776, 698, 664, 556  $cm^{-1}$ ; Elemental analysis calcd (%) for  $C_4N_{12}O_8Na_2$  (390.01): C: 12.31, N: 43.08 %; Found (%): C: 12.42, N: 43.27 %.

#### 1.5 Synthesis of Potassium, ammonium, hydrazinium and hydroxylammonium (2*H*,2'*H*-[5,5'-bistetrazole]-2,2'-diylbis(dinitromethanide)) (5-8)

A mixture of 20 mL acetonitrile and 1 g of **BDNBT** (1 equiv., 2.9 mmol) was combined with 2.2 equiv. of the respective base (potassium ammonia, hydrazine hydrate, or hydroxylamine). The resulting suspension was stirred at 50 °C overnight. The solids were subsequently filtered, washed with water and air-dried to obtain the corresponding high-energy salts (**5-8**).

##### 2.5.1 Potassium (2*H*,2'*H*-[5,5'-bistetrazole]-2,2'-diylbis(dinitromethanide)) (5)

White solid. (1.08 g, 88.2 %).  $^1H$  NMR (300 MHz, DMSO- $d_6$ ):  $\delta$  = 7.07 (s) ppm.  $^{13}C$  NMR (75 MHz, DMSO- $d_6$ ):  $\delta$  = 155.73, 131.07 ppm. IR (KBr,  $\nu/cm^{-1}$ ):  $\nu$  = 1868, 1782, 1733, 1672, 1601, 1438, 1344, 1302, 1216, 1087, 917, 863, 754, 626, 556  $cm^{-1}$ ; Elemental analysis calcd (%) for  $C_4N_{12}O_8K_2$  (422.12): C: 11.37, N: 39.8 %; Found (%): C: 11.28, N: 39.72 %.

##### 2.5.2 Ammonium (2*H*,2'*H*-[5,5'-bistetrazole]-2,2'-diylbis(dinitromethanide)) (6)

White solid. (1.04 g, 94.3 %).  $^1H$  NMR (300 MHz, DMSO- $d_6$ ):  $\delta$  = 7.07 (s) ppm.  $^{13}C$  NMR (75 MHz, DMSO- $d_6$ ):  $\delta$  = 155.73, 131.07 ppm. IR (KBr,  $\nu/cm^{-1}$ ):  $\nu$  = 1908, 1836, 1823, 1620, 1536, 1449, 1361, 1235, 1209, 1164, 1079, 929, 843, 719, 676,

518 cm<sup>-1</sup>; Elemental analysis calcd (%) for C<sub>4</sub>H<sub>8</sub>N<sub>14</sub>O<sub>8</sub> (380.12): C: 12.63, H: 2.10, N: 44.20 %; Found (%): C: 12.58, H: 2.02, N: 44.52 %.

### 2.5.3 Hydrazinium (2*H*,2'*H*-[5,5'-bistetrazole]-2,2'-diylbis(dinitromethanide)) (7)

White solid. (1.00 g, 72.4 %). <sup>1</sup>H NMR (300 MHz, DMSO-d<sub>6</sub>): δ = 5.58 (s) ppm. <sup>13</sup>C NMR (75 MHz, DMSO-d<sub>6</sub>): δ = 155.72, 131.06 ppm. IR (KBr, v/cm<sup>-1</sup>): ν = 1894, 1848, 1811, 1746, 1741, 1612, 1577, 1466, 1354, 1282, 1094, 911, 876, 716, 681 cm<sup>-1</sup>; Elemental analysis calcd (%) for C<sub>4</sub>H<sub>10</sub>N<sub>16</sub>O<sub>8</sub> (410.12): C: 11.70, H: 2.44, N: 54.62 %; Found (%): C: 11.58, H: 2.22, N: 54.81 %.

### 2.5.4 Hydroxylammonium (2*H*,2'*H*-[5,5'-bistetrazole]-2,2'-diylbis(dinitromethanide)) (8)

White solid. (0.90 g, 84.0 %). <sup>1</sup>H NMR (300 MHz, DMSO-d<sub>6</sub>): δ = 7.67 (s) ppm. <sup>13</sup>C NMR (75 MHz, DMSO-d<sub>6</sub>): δ = 155.72, 131.08 ppm. IR (KBr, v/cm<sup>-1</sup>): ν = 1878, 1802, 1783, 1722, 1648, 1515, 1476, 1328, 1277, 1128, 1013, 955, 856, 751, 622 cm<sup>-1</sup>; Elemental analysis calcd (%) for C<sub>4</sub>H<sub>8</sub>N<sub>14</sub>O<sub>10</sub> (412.12): C: 11.65, H: 1.94, N: 47.56 %; Found (%): C: 11.78, H: 2.02, N: 47.81 %.

### 1.6 Synthesis of 3-(Ammoniomethyl)-4,5-diamino-1,2,4-triazol-1-ium 2*H*,2'*H*-[5,5'-bistetrazole]-2,2'-diylbis(dinitromethanide) (9)

To a mixture of 20 mL of deionized water and 1 g of **BDNBT** (1 equiv., 2.9 mmol) was added 1.1 equiv. of the corresponding base (3-(aminomethyl)-4,5-diamino-1,2,4-triazole) and the suspension was stirred at 50 °C overnight. The solid was then collected by filtration and dried in air to get a yellow solid (1.26 g, 92.0 %). <sup>1</sup>H NMR (300 MHz, DMSO-d<sub>6</sub>): δ = 8.40 (s, 1H), 5.91 (s, 1H), 4.19 (s, 1H) ppm. <sup>13</sup>C NMR (75 MHz, DMSO-d<sub>6</sub>): δ = 155.72, 151.99, 146.81, 131.07, 32.96 ppm. IR (KBr, v/cm<sup>-1</sup>): ν = 2046, 1952, 1833, 1749, 1566, 1402, 1379, 1301, 1033, 885, 824, 762, 514 cm<sup>-1</sup>; Elemental analysis calcd (%) for C<sub>7</sub>H<sub>10</sub>N<sub>18</sub>O<sub>8</sub> (474.09): C: 17.73, H: 2.13, N: 53.16 %; Found (%): C: 17.58, H: 2.02, N: 53.41 %.

### 1.7 Synthesis of 2,4,6-triamino-1,3-dihydroxy-1,3,5-triazine-1,3-diiium 2*H*,2'*H*-[5,5'-bistetrazole]-2,2'-diylbis(dinitromethanide) (10)

Similar to **9**, to a mixture of 20 mL of deionized water and 1 g of **BDNBT** (1 equiv., 2.9 mmol) was added 1.1 equiv. of the corresponding base (2,4,6-triamino-1,3,5-

triazine-1,3-dioxide) and the suspension was stirred at 50 °C overnight. The solid was then collected by filtration and dried in air to get a white solid (1.37 g, 94.1%). <sup>1</sup>H NMR (300 MHz, DMSO-d<sub>6</sub>): δ = 9.37 (s, 1H), 9.14 (s, 1H), 8.69 (s, 1H) ppm. <sup>13</sup>C NMR (75 MHz, DMSO-d<sub>6</sub>): δ = 155.70, 152.60, 151.89, 131.03 ppm. IR (KBr, ν/cm<sup>-1</sup>): ν = 2174, 2081, 1966, 1846, 1808, 1711, 1649, 1355, 1142, 1069, 998, 846, 732, 649 cm<sup>-1</sup>; Elemental analysis calcd (%) for C<sub>7</sub>H<sub>8</sub>N<sub>18</sub>O<sub>10</sub> (504.07): C: 16.67, H: 2.16, N: 50.0 %; Found (%): C: 16.78, H: 2.02, N: 49.81 %.

## 2. General Methods

### <sup>1</sup>H and <sup>13</sup>C NMR spectra

<sup>1</sup>H and <sup>13</sup>C NMR spectra were recorded on 300 MHz (Bruker AVANCE 300) clear magnetic resonance spectrometers operating at 300 and 75 MHz, respectively, by using either DMSO-*d*<sub>6</sub> as the solvent and locking solvent unless otherwise stated. Chemical shifts in <sup>1</sup>H and <sup>13</sup>C NMR spectra are reported relative to DMSO. DSC was performed at a heating rate of 10 °C min<sup>-1</sup> in closed Al containers with a nitrogen flow of 30 mL min<sup>-1</sup> on an STD-Q600 instrument. Infrared (IR) spectra were recorded on a Perkin-Elmer Spectrum BX FT-IR equipped with an ATR unit at 25 °C. Impact sensitivity, friction sensitivity and electrostatic discharge sensitivity of samples are measured by using the standard BAM methods.

### X-ray Crystallography

The crystal of **α-BDNBT** (298K & 193K), **β-BDNBT**, **3**, 0.5 (4·2CH<sub>3</sub>OH), **5**, **7** (2H<sub>2</sub>O), **9** CH<sub>3</sub>OH H<sub>2</sub>O were performed on a Bruker Smart Apex II diffractometer with graphite-monochromated Mo K $\alpha$  radiation ( $\lambda$ = 0.71073 Å), respectively. Integration and scaling of intensity data were accomplished using the SAINT program<sup>2</sup>. The structures were solved by intrinsic using SHELXT2014 and refinement was carried out by a full- matrix least-squares technique using SHELXT2014. The hydrogen atoms were refined isotropically, and the heavy atoms were refined anisotropically. N-H and O-H hydrogens were located from different electron density maps, and C-H hydrogens were placed in calculated positions and refined with a riding model. Data were corrected for the effects of absorption using SADABS4 Relevant crystal data and refinement results are summarized in **Table S1**.

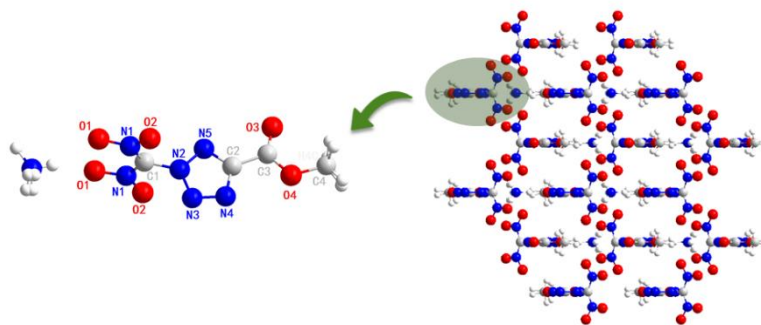

**Figure S1** Structures and stacking diagrams of **3**

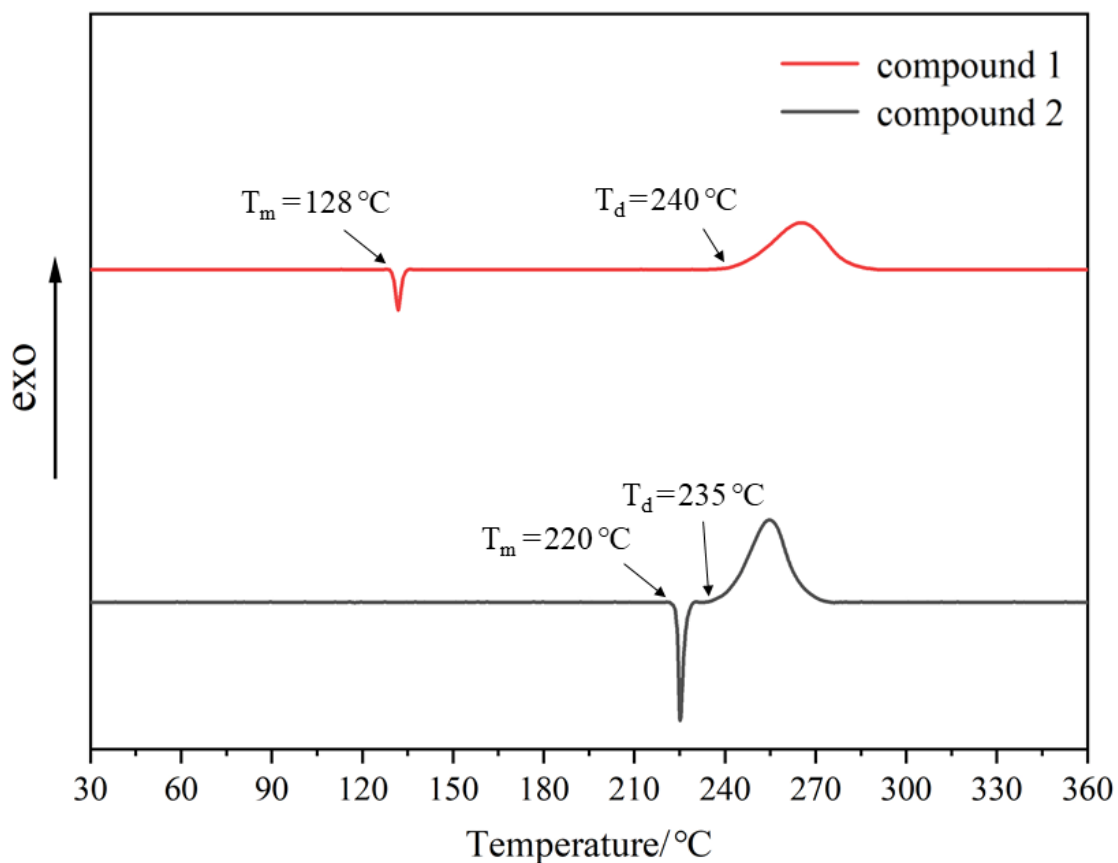

Figure S2 DSC plots of compound 1 and 2

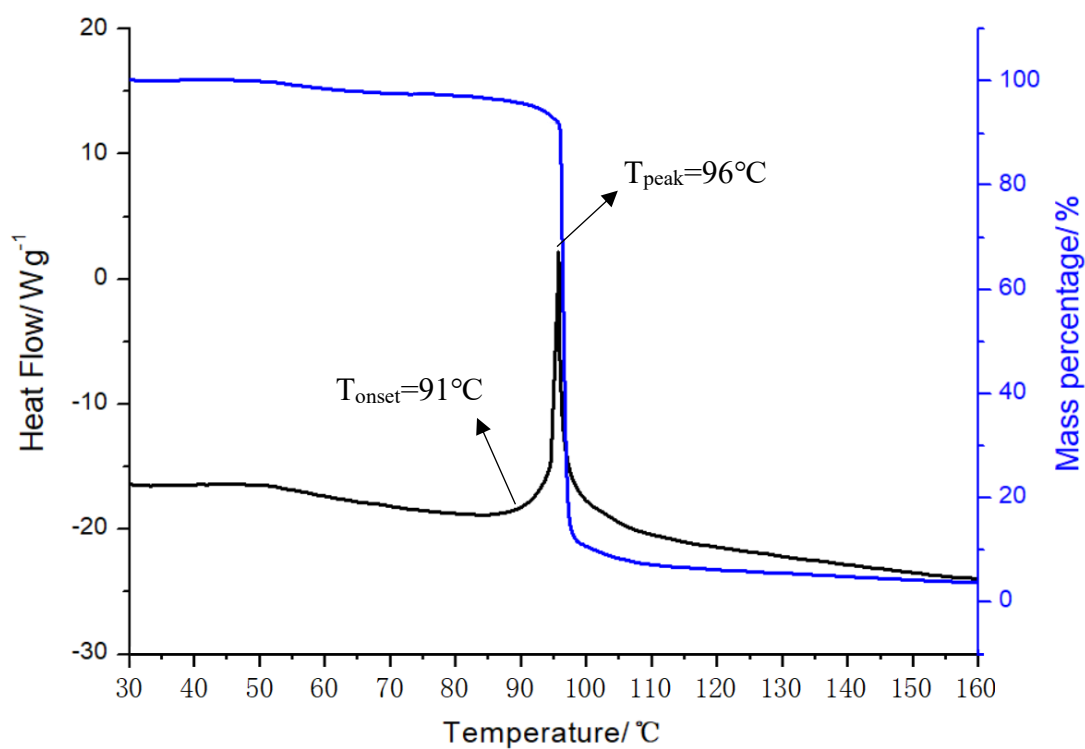

Figure S3 DSC-TG plots of  $\alpha$ -BDNBT



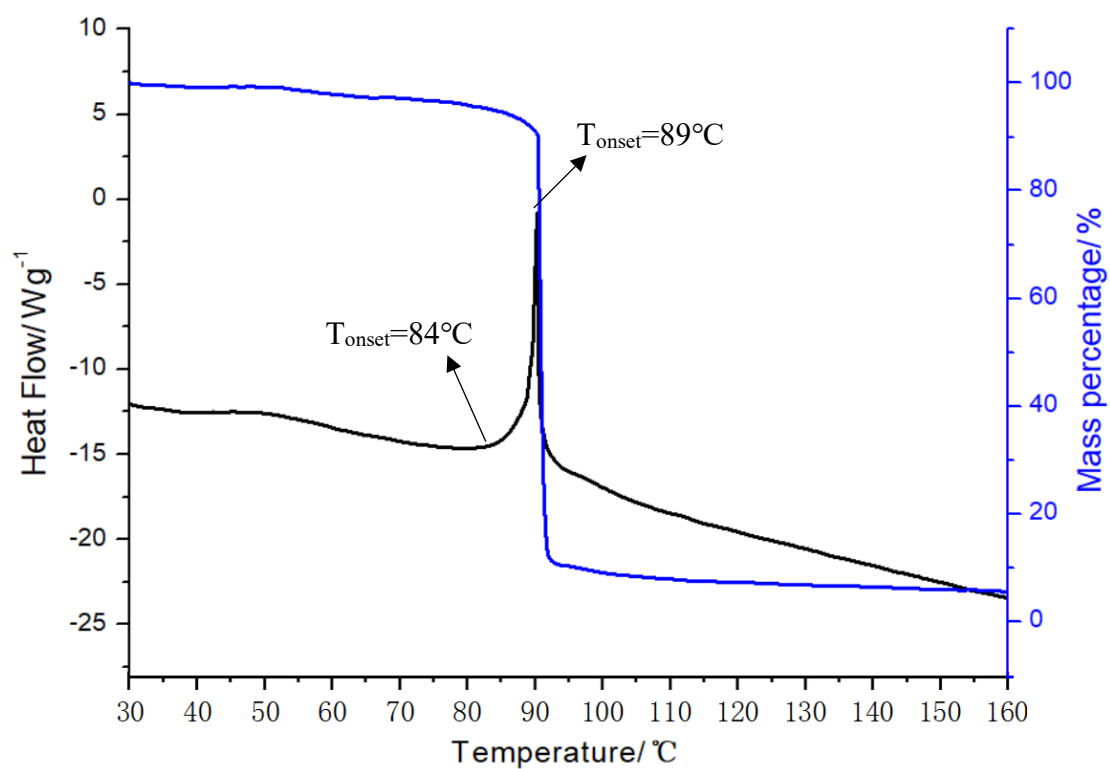

**Figure S4** DSC-TG plots of  $\beta$ -BDNBT

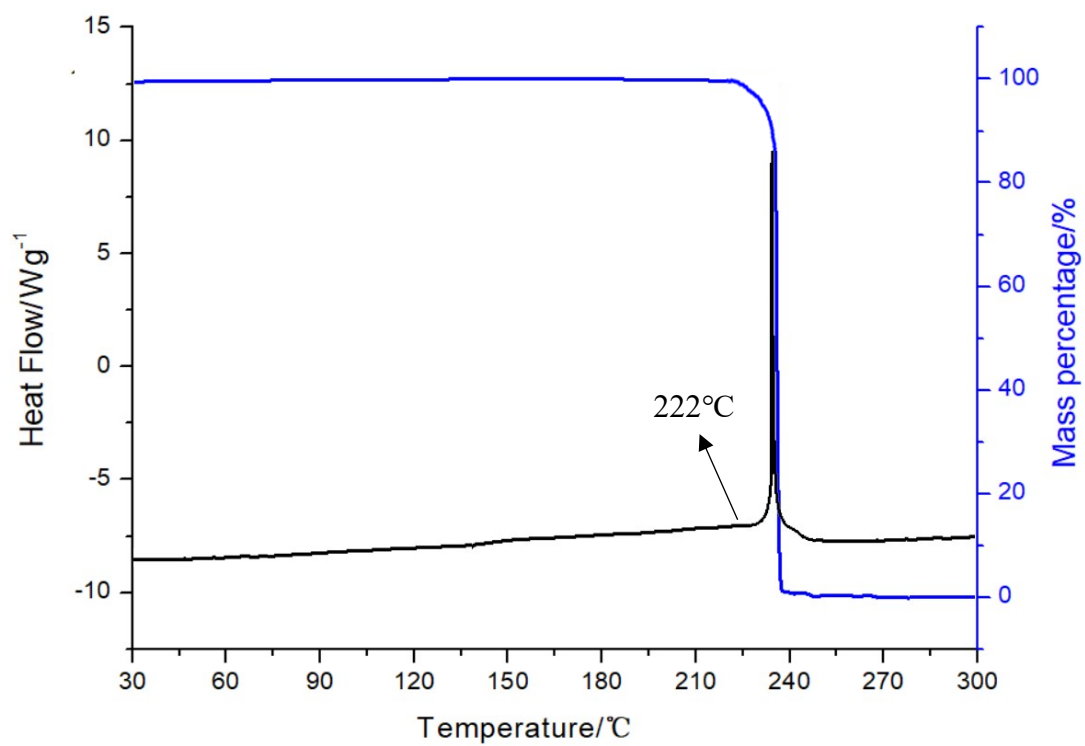

**Figure S5** DSC-TG plots of compound **5**

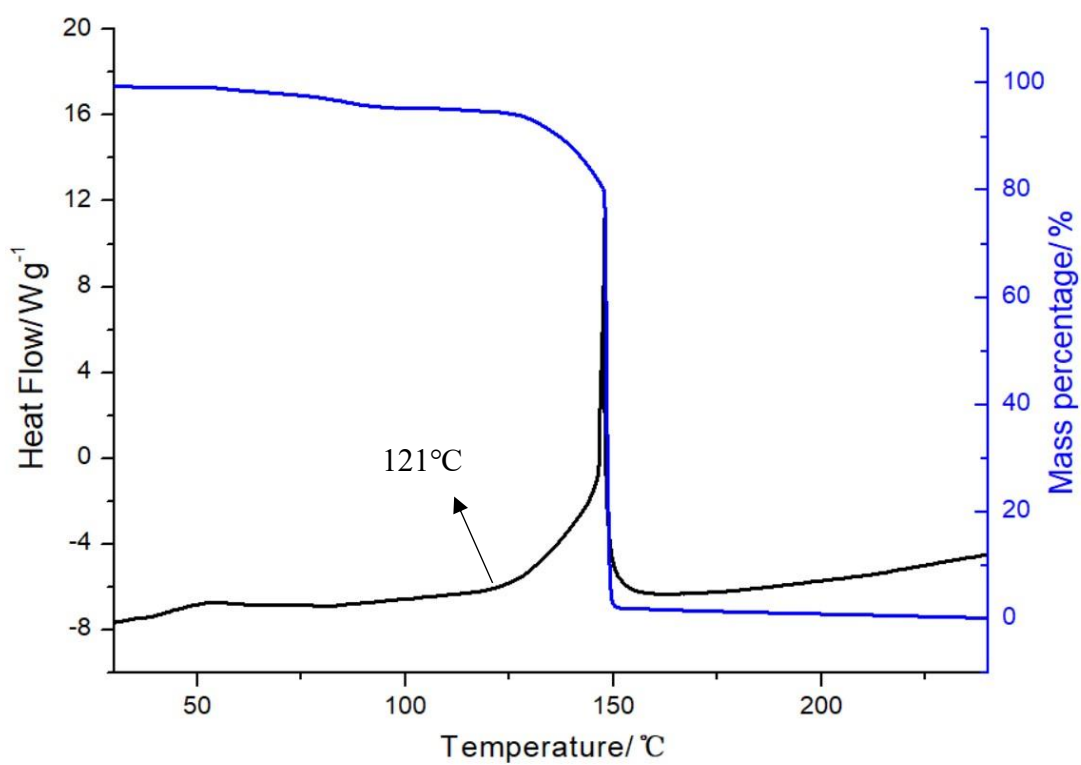

**Figure S6** DSC-TG plots of compound **6**

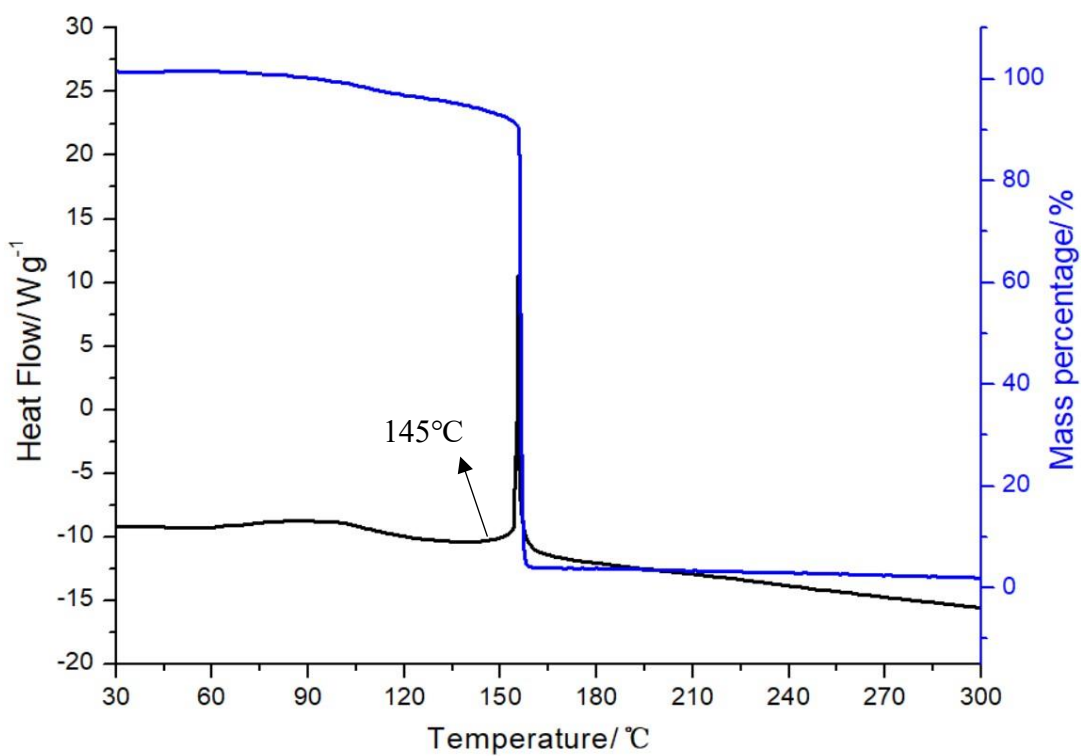

**Figure S7** DSC-TG plots of compound **7**

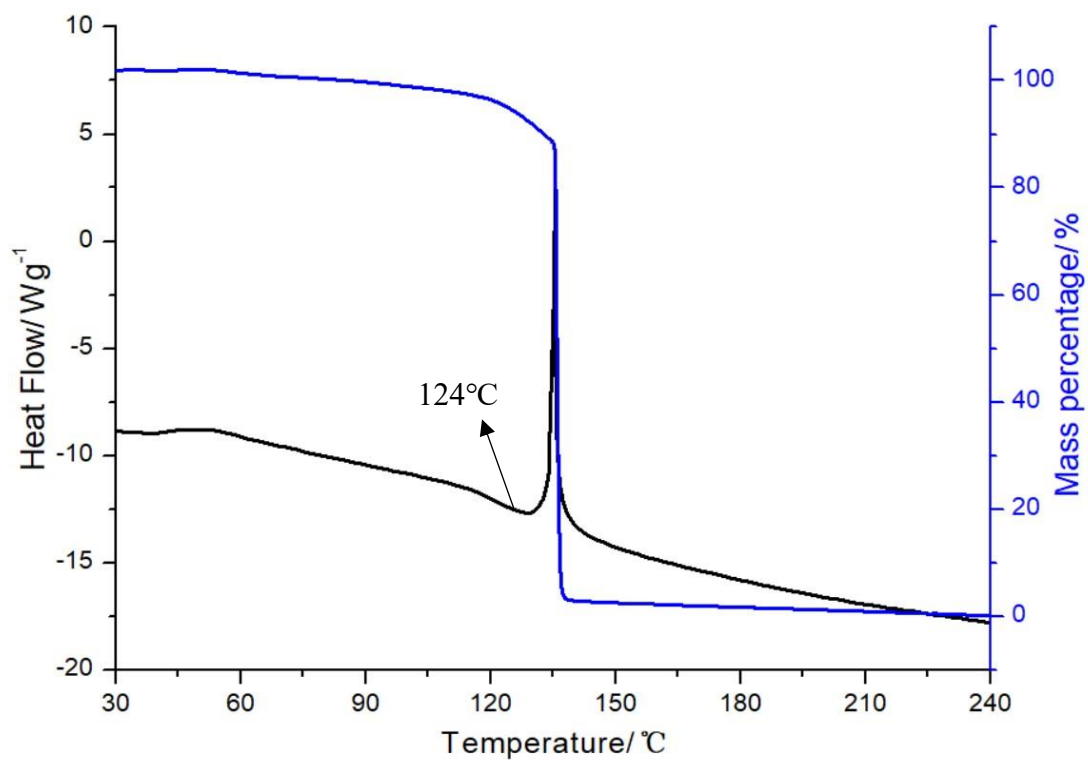

Figure S8 DSC-TG plots of compound 8

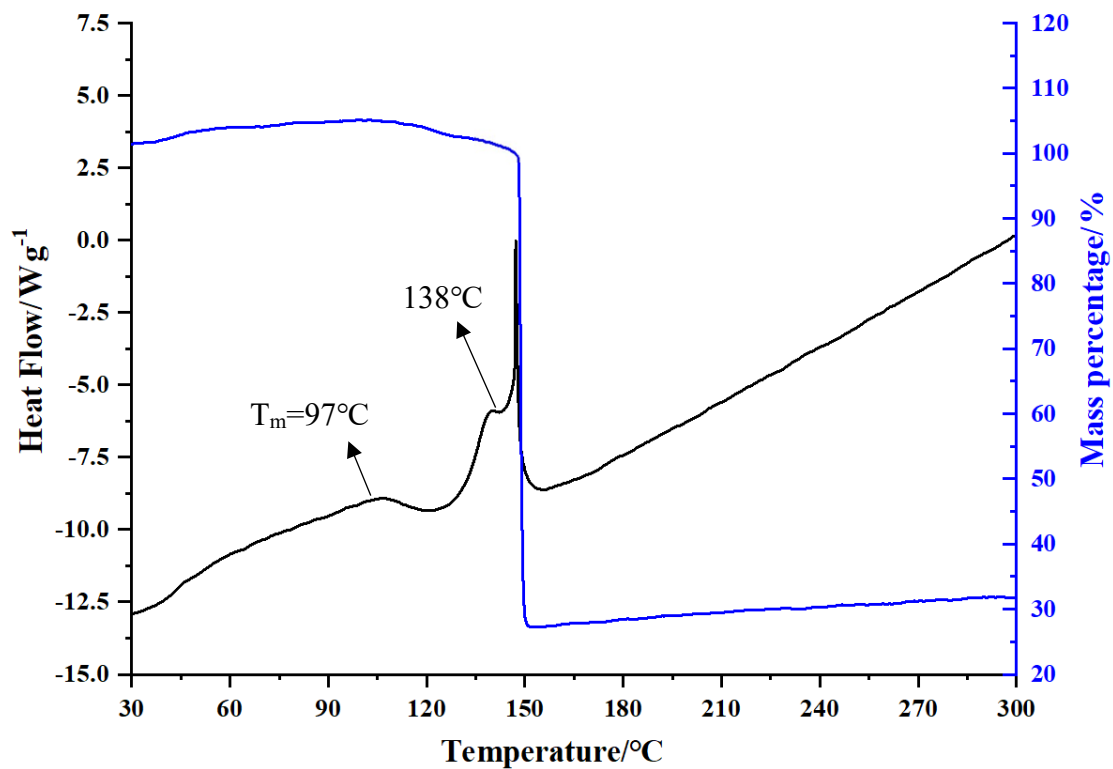

Figure S9 DSC-TG plots of compound 9

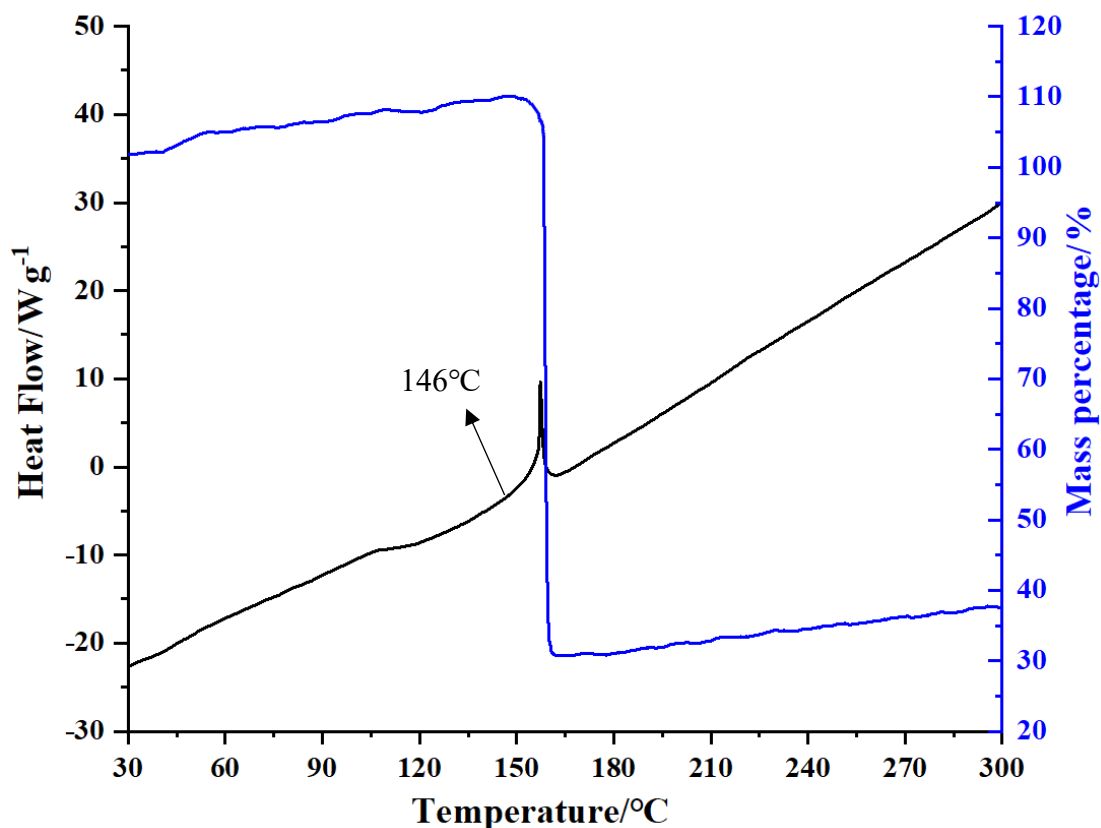

**Figure S10** DSC-TG plots of compound **10**

**Table S1.** Crystal data and structure refinement for  $\alpha$ -BDNBT (298K & 193K),  $\beta$ -BDNBT, **3**, 0.5 (4·2CH<sub>3</sub>OH), **5**, 7 (2H<sub>2</sub>O), **9** CH<sub>3</sub>OH H<sub>2</sub>O

| <b>Crystal</b>    | $\alpha$ -BDNBT                                              | $\alpha$ -BDNBT                                              | $\beta$ -BDNBT                                               |
|-------------------|--------------------------------------------------------------|--------------------------------------------------------------|--------------------------------------------------------------|
| CCDC number       | 2336254                                                      | 2336263                                                      | 2336247                                                      |
| Empirical formula | C <sub>4</sub> H <sub>2</sub> N <sub>12</sub> O <sub>8</sub> | C <sub>4</sub> H <sub>2</sub> N <sub>12</sub> O <sub>8</sub> | C <sub>4</sub> H <sub>2</sub> N <sub>12</sub> O <sub>8</sub> |
| Formula weight    | 346.18                                                       | 346.18                                                       | 346.18                                                       |
| Temperature/K     | 298.00                                                       | 193.00                                                       | 193.00                                                       |
| Crystal system    | monoclinic                                                   | monoclinic                                                   | monoclinic                                                   |
| Space group       | P2 <sub>1</sub> /n                                           | P2 <sub>1</sub> /n                                           | P2 <sub>1</sub> /c                                           |
| <i>a</i> [Å]      | 7.5996(11)                                                   | 7.5860(6)                                                    | 9.9607(4)                                                    |
| <i>b</i> [Å]      | 9.8309(12)                                                   | 9.7376(7)                                                    | 13.8634(6)                                                   |
| <i>c</i> [Å]      | 8.5177(13)                                                   | 8.4712(7)                                                    | 8.7688(4)                                                    |
| $\alpha$ [°]      | 90                                                           | 90                                                           | 90                                                           |
| $\beta$ [°]       | 106.068(5)                                                   | 106.588(3)                                                   | 90.094(3)                                                    |
| $\gamma$ [°]      | 90                                                           | 90                                                           | 90                                                           |

|                                             |                                                              |                                                              |                                                               |
|---------------------------------------------|--------------------------------------------------------------|--------------------------------------------------------------|---------------------------------------------------------------|
| Volume                                      | 611.50(15)                                                   | 599.72(8)                                                    | 1210.87(9)                                                    |
| Z                                           | 2                                                            | 2                                                            | 4                                                             |
| $\rho$ (g cm <sup>-3</sup> )                | 1.880                                                        | 1.917                                                        | 1.899                                                         |
| $\mu$ /mm <sup>-1</sup>                     | 0.177                                                        | 0.181                                                        | 1.608                                                         |
| F(000)                                      | 348.0                                                        | 348.0                                                        | 696.0                                                         |
| Crystal size (mm <sup>3</sup> )             | 0.13×0.12×0.11                                               | 0.13×0.12×0.1                                                | 0.13×0.12×0.1                                                 |
| Radiation                                   | MoK $\alpha$ ( $\lambda$ = 0.71073)                          | MoK $\alpha$ ( $\lambda$ = 0.71073)                          | CuK $\alpha$ ( $\lambda$ = 1.54178)                           |
| Theta range for data collection             | 6.366 to 54.976                                              | 6.366 to 54.972                                              | 6.376 to 137.454                                              |
| Index ranges                                | -9≤h≤9, -12≤k≤12, -11≤l≤11                                   | -9≤h≤9, -12≤k≤12, -10≤l≤11                                   | -11≤h≤12, -16≤k≤16, -9≤l≤10                                   |
| Reflections collected                       | 10368                                                        | 12619                                                        | 8450                                                          |
| Independent reflections                     | 1399[R <sub>int</sub> = 0.0671, R <sub>sigma</sub> = 0.0370] | 1365[R <sub>int</sub> = 0.0767, R <sub>sigma</sub> = 0.0443] | 2215 [R <sub>int</sub> = 0.0331, R <sub>sigma</sub> = 0.0312] |
| Data/restraints/parameters                  | 1399/0/109                                                   | 1365/0/109                                                   | 2215/424/327                                                  |
| Goodness-of-fit on F <sup>2</sup>           | 1.048                                                        | 1.079                                                        | 1.020                                                         |
| Final R indices [I>2 $\sigma$ (I)]          | R <sub>1</sub> = 0.0392, wR <sub>2</sub> = 0.0950            | R <sub>1</sub> = 0.0386, wR <sub>2</sub> = 0.1003            | R <sub>1</sub> = 0.0838, wR <sub>2</sub> = 0.2175             |
| Final R indexes [all data]                  | R <sub>1</sub> = 0.0551, wR <sub>2</sub> = 0.1040            | R <sub>1</sub> = 0.0418, wR <sub>2</sub> = 0.1037            | R <sub>1</sub> = 0.1060, wR <sub>2</sub> = 0.2407             |
| Largest diff. peak/hole / e Å <sup>-3</sup> | 0.26/-0.19                                                   | 0.35/-0.27                                                   | 0.46/-0.41                                                    |

| <b>Crystal</b>    | <b>0.5 (4·2CH<sub>3</sub>OH)</b>                              | <b>5</b>                                                     | <b>7 (2H<sub>2</sub>O)</b>                                         |
|-------------------|---------------------------------------------------------------|--------------------------------------------------------------|--------------------------------------------------------------------|
| CCDC number       | 2336255                                                       | 2339222                                                      | 2336256                                                            |
| Empirical formula | C <sub>3</sub> H <sub>4</sub> N <sub>6</sub> NaO <sub>5</sub> | C <sub>4</sub> K <sub>2</sub> N <sub>12</sub> O <sub>8</sub> | C <sub>48</sub> H <sub>160</sub> N <sub>192</sub> O <sub>112</sub> |
| Formula weight    | 227.11                                                        | 422.36                                                       | 5219.67                                                            |
| Temperature/K     | 193.00                                                        | 223.00                                                       | 193.00                                                             |

|                                             |                                                              |                                                            |                                                            |
|---------------------------------------------|--------------------------------------------------------------|------------------------------------------------------------|------------------------------------------------------------|
| Crystal system                              | monoclinic                                                   | monoclinic                                                 | monoclinic                                                 |
| Space group                                 | C2/m                                                         | P2 <sub>1</sub> /c                                         | C2/c                                                       |
| <i>a</i> [Å]                                | 14.932(5)                                                    | 7.2374(8)                                                  | 32.7745(14)                                                |
| <i>b</i> [Å]                                | 7.5092(19)                                                   | 8.0107(9)                                                  | 16.9448(7)                                                 |
| <i>c</i> [Å]                                | 8.709(4)                                                     | 12.5488(10)                                                | 17.7319(7)                                                 |
| $\alpha$ [°]                                | 90                                                           | 90                                                         | 90                                                         |
| $\beta$ [°]                                 | 125.26(2)                                                    | 96.544(4)                                                  | 91.598(3)                                                  |
| $\gamma$ [°]                                | 90                                                           | 90                                                         | 90                                                         |
| Volume                                      | 797.4(5)                                                     | 722.80(13)                                                 | 9843.7(7)                                                  |
| <i>Z</i>                                    | 4                                                            | 2                                                          | 2                                                          |
| $\rho$ (g cm <sup>-3</sup> )                | 1.892                                                        | 1.941                                                      | 1.761                                                      |
| $\mu$ /mm <sup>-1</sup>                     | 0.217                                                        | 0.731                                                      | 1.456                                                      |
| F(000)                                      | 460.0                                                        | 420.0                                                      | 5376.0                                                     |
| Crystal size (mm <sup>3</sup> )             | 0.14×0.13×0.1                                                | 0.13×0.11×0.1                                              | 0.13×0.12×0.1                                              |
| Radiation                                   | MoK $\alpha$ ( $\lambda$ =0.71073)                           | MoK $\alpha$ ( $\lambda$ =0.71073)                         | CuK $\alpha$ ( $\lambda$ =1.54178)                         |
| Theta range for data collection             | 5.728 to 50.812                                              | 5.666 to 54.976                                            | 5.394 to 136.872                                           |
| Index ranges                                | -18≤ <i>h</i> ≤17, -6≤ <i>k</i> ≤9, -10≤ <i>l</i> ≤10        | -9≤ <i>h</i> ≤9, -10≤ <i>k</i> ≤10, -16≤ <i>l</i> ≤16      | -39≤ <i>h</i> ≤39, -20≤ <i>k</i> ≤19, -19≤ <i>l</i> ≤21    |
| Reflections collected                       | 2362                                                         | 17489                                                      | 41398                                                      |
| Independent reflections                     | 778 [R <sub>int</sub> = 0.0878, R <sub>sigma</sub> = 0.0721] | 1661[R <sub>int</sub> =0.0841, R <sub>sigma</sub> =0.0348] | 9031[R <sub>int</sub> =0.0879, R <sub>sigma</sub> =0.0531] |
| Data/restraints/parameters                  | 778/18/85                                                    | 1661/0/118                                                 | 9031/345/963                                               |
| Goodness-of-fit on F <sup>2</sup>           | 1.052                                                        | 1.064                                                      | 1.096                                                      |
| Final R indices [I>2σ(I)]                   | R <sub>1</sub> = 0.0687, wR <sub>2</sub> = 0.1617            | R <sub>1</sub> =0.0307,wR <sub>2</sub> = 0.0741            | R <sub>1</sub> =0.0945, wR <sub>2</sub> = 0.2183           |
| Final R indexes [all data]                  | R <sub>1</sub> = 0.0862, wR <sub>2</sub> = 0.1739            | R <sub>1</sub> =0.0440,wR <sub>2</sub> = 0.0824            | R <sub>1</sub> =0.1461, wR <sub>2</sub> = 0.2490           |
| Largest diff. peak/hole / e Å <sup>-3</sup> | 0.40/-0.83                                                   | 0.36/-0.35                                                 | 0.53/-0.40                                                 |

| <b>Crystal</b>                               | <b>9 CH<sub>3</sub>OH H<sub>2</sub>O</b>                       | <b>3</b>                                                    |
|----------------------------------------------|----------------------------------------------------------------|-------------------------------------------------------------|
| CCDC number                                  | 2339223                                                        | 2336277                                                     |
| Empirical formula                            | C <sub>15</sub> H <sub>26</sub> N <sub>3</sub> O <sub>18</sub> | C <sub>4</sub> H <sub>7</sub> N <sub>7</sub> O <sub>6</sub> |
| Formula weight                               | 998.72                                                         | 249.17                                                      |
| Temperature/K                                | 218.00                                                         | 193.00                                                      |
| Crystal system                               | monoclinic                                                     | monoclinic                                                  |
| Space group                                  | C2/c                                                           | P2 <sub>1</sub> /m                                          |
| <i>a</i> [Å]                                 | 17.3785(17)                                                    | 7.856(3)                                                    |
| <i>b</i> [Å]                                 | 11.5111(12)                                                    | 8.001(4)                                                    |
| <i>c</i> [Å]                                 | 21.222(3)                                                      | 8.291(4)                                                    |
| $\alpha$ [°]                                 | 90                                                             | 90                                                          |
| $\beta$ [°]                                  | 112.132(5)                                                     | 103.603(15)                                                 |
| $\gamma$ [°]                                 | 90                                                             | 90                                                          |
| Volume                                       | 3932.5(8)                                                      | 506.6(4)                                                    |
| <i>Z</i>                                     | 4                                                              | 2                                                           |
| $\rho$ (g cm <sup>-3</sup> )                 | 1.687                                                          | 1.634                                                       |
| $\mu$ /mm <sup>-1</sup>                      | 1.329                                                          | 0.151                                                       |
| F(000)                                       | 2048.0                                                         | 256.0                                                       |
| Crystal size (mm <sup>3</sup> )              | 0.15 × 0.13 × 0.12                                             | 0.13 × 0.12 × 0.11                                          |
| Radiation                                    | CuK $\alpha$ ( $\lambda$ = 1.54178)                            | MoK $\alpha$ ( $\lambda$ = 0.71073)                         |
| Theta range for data collection              | 8.996 to 133.186                                               | 5.054 to 54.964                                             |
| Index ranges                                 | -20 ≤ <i>h</i> ≤ 19, -13 ≤ <i>k</i> ≤ 13, -25 ≤ <i>l</i> ≤ 24  | -10 ≤ <i>h</i> ≤ 9, 0 ≤ <i>k</i> ≤ 10, 0 ≤ <i>l</i> ≤ 10    |
| Reflections collected                        | 14734                                                          | 1222                                                        |
| Independent reflections                      | 3356 [R <sub>int</sub> = 0.0595, R <sub>sigma</sub> = 0.0529]  | 1222                                                        |
| Data/restraints/parameters                   | 3356/268/393                                                   | 1222/1/91                                                   |
| Goodness-of-fit on F <sup>2</sup>            | 0.959                                                          | 0.980                                                       |
| Final R indices [ <i>I</i> > 2σ( <i>I</i> )] | R <sub>1</sub> = 0.0998, wR <sub>2</sub> = 0.2071              | R <sub>1</sub> = 0.0671, wR <sub>2</sub> = 0.1560           |
| Final R indexes [all data]                   | R <sub>1</sub> = 0.1115, wR <sub>2</sub> = 0.2132              | R <sub>1</sub> = 0.1219, wR <sub>2</sub> = 0.1844           |
| Largest diff. peak/hole / e                  | 0.56/-0.33                                                     | 0.29/-0.32                                                  |

**Table S2.** Selected bond lengths [Å] and angles [°] for  $\alpha$ -BDNBT

| parameter | Å          | parameter | Å          |
|-----------|------------|-----------|------------|
| O1-N5     | 1.2132(16) | N2-C1     | 1.3615(17) |
| O2-N5     | 1.2052(16) | N3-N4     | 1.3401(16) |
| O3-N6     | 1.2150(18) | N4-C2     | 1.4149(17) |
| O4-N6     | 1.1989(17) | N5-C2     | 1.5209(18) |
| N1-N4     | 1.3361(15) | N6-C2     | 1.5311(17) |
| N1-C1     | 1.3153(17) | C1-C1_a   | 1.4525(18) |
| N2-N3     | 1.2983(18) | C2-H2     | 1          |

| parameter | Å          | parameter  | Å          |
|-----------|------------|------------|------------|
| N4-N1-C1  | 100.50(10) | O4-N6-C2   | 118.09(12) |
| N3-N2-C1  | 106.15(11) | N1-C1-N2   | 113.48(12) |
| N2-N3-N4  | 105.65(11) | N1-C1-C1_a | 123.70(12) |
| N1-N4-N3  | 114.22(11) | N2-C1-C1_a | 122.81(12) |
| N1-N4-C2  | 124.48(10) | N4-C2-N5   | 111.62(10) |
| N3-N4-C2  | 121.27(10) | N4-C2-N6   | 109.80(11) |
| O1-N5-O2  | 126.43(13) | N5-C2-N6   | 108.19(10) |
| O1-N5-C2  | 117.64(11) | N4-C2-H2   | 109        |
| O2-N5-C2  | 115.93(11) | N5-C2-H2   | 109        |
| O3-N6-O4  | 127.96(12) | N6-C2-H2   | 109        |
| O3-N6-C2  | 113.88(11) |            |            |

**Table S3.** Torsion angles [°] of  $\alpha$ -BDNBT

| parameter   | Å          | parameter   | Å          |
|-------------|------------|-------------|------------|
| C1-N1-N4-N3 | 0.87(14)   | O1-N5-C2-N4 | -46.83(15) |
| C1-N1-N4-C2 | 178.79(12) | O1-N5-C2-N6 | 74.08(14)  |



|               |             |                 |             |
|---------------|-------------|-----------------|-------------|
| N4-N1-C1-N2   | -0.94(14)   | O2-N5-C2-N4     | 132.13(12)  |
| N4-N1-C1-C1_a | 178.29(12)  | O2-N5-C2-N6     | -106.97(13) |
| C1-N2-N3-N4   | -0.12(14)   | O3-N6-C2-N4     | -41.90(15)  |
| N3-N2-C1-N1   | 0.71(16)    | O3-N6-C2-N5     | -163.93(12) |
| N3-N2-C1-C1_a | -178.52(12) | O4-N6-C2-N4     | 140.90(12)  |
| N2-N3-N4-N1   | -0.49(15)   | O4-N6-C2-N5     | 18.87(16)   |
| N2-N3-N4-C2   | -178.49(11) | N1-C1-C1_a-N1_a | 180.00(13)  |
| N1-N4-C2-N5   | 63.46(15)   | N1-C1-C1_a-N2_a | 0.8(2)      |
| N1-N4-C2-N6   | -56.51(15)  | N2-C1-C1_a-N1_a | -0.8(2)     |
| N3-N4-C2-N5   | -118.76(12) | N2-C1-C1_a-N2_a | 180.00(12)  |
| N3-N4-C2-N6   | 121.28(12)  |                 |             |

**Table S4.** Hydrogen bonds of  $\alpha$ -BDNBT

| D-H...A    | d(D-H)/Å | d(H...A)/ Å | d(D...A)/ Å | <(DHA)/° |
|------------|----------|-------------|-------------|----------|
| C2-H2...O3 | 1        | 2.59        | 3.1599(18)  | 116      |

**Table S5.** Selected bond lengths [Å] and angles [°] for  $\beta$ -BDNBT

| parameter | Å         | parameter | Å         |
|-----------|-----------|-----------|-----------|
| O1-N5     | 1.175(18) | N4-C1     | 1.355(7)  |
| O1A-N5A   | 1.18(2)   | N5-C2     | 1.611(12) |
| O2-N5     | 1.186(14) | N5A-C2    | 1.438(15) |
| O2A-N5A   | 1.19(2)   | N6-C2     | 1.492(12) |
| O3-N6     | 1.146(15) | N6A-C2    | 1.610(19) |
| O3A-N6A   | 1.23(3)   | N7-C3     | 1.296(7)  |
| O4-N6     | 1.238(18) | N7-N8     | 1.371(7)  |
| O4A-N6A   | 1.25(3)   | N8-C4     | 1.433(8)  |
| O5-N11    | 1.206(14) | N8-N9     | 1.306(7)  |
| O5A-N11A  | 1.23(3)   | N9-N10    | 1.319(7)  |
| O6-N11    | 1.203(17) | N10-C3    | 1.365(7)  |
| O6A-N11A  | 1.23(3)   | N11-C4    | 1.591(12) |

|          |           |         |           |
|----------|-----------|---------|-----------|
| O7-N12   | 1.271(16) | N11A-C4 | 1.529(18) |
| O7A-N12A | 1.26(2)   | N12-C4  | 1.540(12) |
| O8-N12   | 1.188(15) | N12A-C4 | 1.560(16) |
| O8A-N12A | 1.202(19) | C1-C1_a | 1.448(8)  |
| N1-N2    | 1.303(7)  | C2-H2A  | 1         |
| N1-C1    | 1.332(7)  | C2-H2B  | 1         |
| N2-N3    | 1.356(8)  | C3-C3_b | 1.442(8)  |
| N2-C2    | 1.416(8)  | C4-H4A  | 1         |
| N3-N4    | 1.289(8)  | C4-H4B  | 1         |

| <b>parameter</b> | <b>Å</b>  | <b>parameter</b> | <b>Å</b>  |
|------------------|-----------|------------------|-----------|
| N2-N1-C1         | 101.8(5)  | O6A-N11A-C4      | 121.9(16) |
| N1-N2-N3         | 114.7(5)  | O5A-N11A-C4      | 90.0(17)  |
| N1-N2-C2         | 125.4(5)  | O8-N12-C4        | 115.3(11) |
| N3-N2-C2         | 119.8(5)  | O7-N12-C4        | 95.6(9)   |
| N2-N3-N4         | 104.1(5)  | O7-N12-O8        | 145.7(12) |
| N3-N4-C1         | 108.4(5)  | O7A-N12A-O8A     | 97.7(15)  |
| O1-N5-O2         | 124.1(12) | O7A-N12A-C4      | 126.3(12) |
| O1-N5-C2         | 112.3(10) | O8A-N12A-C4      | 129.3(14) |
| O2-N5-C2         | 121.2(10) | N1-C1-C1_a       | 124.7(5)  |
| O1A-N5A-O2A      | 124.5(17) | N4-C1-C1_a       | 124.3(5)  |
| O1A-N5A-C2       | 114.5(15) | N1-C1-N4         | 111.0(5)  |
| O2A-N5A-C2       | 120.2(15) | N2-C2-N6         | 109.6(6)  |
| O3-N6-C2         | 127.8(13) | N2-C2-N5A        | 112.6(8)  |
| O3-N6-O4         | 124.2(16) | N2-C2-N6A        | 101.6(8)  |
| O4-N6-C2         | 106.9(11) | N5-C2-N6         | 102.3(7)  |
| O3A-N6A-O4A      | 129(2)    | N5A-C2-N6A       | 108.6(11) |
| O3A-N6A-C2       | 103.4(18) | N2-C2-N5         | 110.0(6)  |
| O4A-N6A-C2       | 124.4(17) | N6A-C2-H2B       | 111       |

|            |           |               |           |
|------------|-----------|---------------|-----------|
| N8-N7-C3   | 100.5(4)  | N6-C2-H2A     | 111       |
| N7-N8-C4   | 123.4(5)  | N5A-C2-H2B    | 111       |
| N7-N8-N9   | 114.3(5)  | N2-C2-H2B     | 111       |
| N9-N8-C4   | 122.3(5)  | N5-C2-H2A     | 112       |
| N8-N9-N10  | 105.6(5)  | N2-C2-H2A     | 111       |
| N9-N10-C3  | 106.2(5)  | N7-C3-C3_b    | 123.8(5)  |
| O6-N11-C4  | 113.6(10) | N7-C3-N10     | 113.4(5)  |
| O5-N11-C4  | 113.8(9)  | N10-C3-C3_b   | 122.8(5)  |
| O5-N11-O6  | 132.2(12) | N11A-C4 -N12A | 112.7(14) |
| N8-C4-N12  | 113.5(6)  | N8-C4-H4B     | 106       |
| N8-C4-N11A | 115.8(8)  | N11-C4-H4A    | 110       |
| N8-C4-N12A | 109.8(9)  | N12-C4-H4A    | 110       |
| N11-C4-N12 | 104.2(7)  | N11A-C4-H4B   | 106       |
| N8-C4-H4A  | 110       | N12A-C4-H4B   | 106       |

**Table S6.** Torsion angles [°] of  $\beta$ -BDNBT

| <b>parameter</b> | <b>Å</b>  | <b>parameter</b> | <b>Å</b>   |
|------------------|-----------|------------------|------------|
| C1-N1-N2-N3      | 1.7(6)    | O1-N5-C2-N6      | -142.5(11) |
| C1-N1-N2-C2      | 178.4(5)  | O2-N5-C2-N2      | 170.9(10)  |
| N2-N1-C1-N4      | -2.2(6)   | O2-N5-C2-N6      | 54.5(13)   |
| N2-N1-C1-C1_a    | 179.3(5)  | O3-N6-C2-N2      | -99.1(17)  |
| N1-N2-N3-N4      | -0.4(7)   | O3-N6-C2-N5      | 17.6(18)   |
| C2-N2-N3-N4      | -177.3(5) | O4-N6-C2-N2      | 92.9(11)   |
| N1-N2-C2-N5      | -74.4(8)  | O4-N6-C2-N5      | -150.3(10) |
| N1-N2-C2-N6      | 37.4(8)   | N8-N7-C3-C3_b    | 178.0(5)   |
| N3-N2-C2-N5      | 102.1(7)  | C3-N7-N8-N9      | 1.9(6)     |
| N3-N2-C2-N6      | -146.1(6) | C3-N7-N8-C4      | -177.8(5)  |
| N2-N3-N4-C1      | -1.0(6)   | N8-N7-C3-N10     | -0.7(6)    |
| N3-N4-C1-N1      | 2.1(7)    | N7-N8-N9-N10     | -2.4(6)    |

|                |           |                   |           |
|----------------|-----------|-------------------|-----------|
| N3-N4-C1-C1_a  | -179.3(5) | C4-N8-N9-N10      | 177.3(5)  |
| O1-N5-C2-N2    | -26.0(13) | N7-N8-C4-N11      | 79.2(8)   |
| N9-N8-C4-N12   | 144.4(7)  | O7-N12-C4-N8      | -74.9(10) |
| N7-N8-C4-N12   | -35.9(9)  | O8-N12-C4-N8      | 89.8(11)  |
| N9-N8-C4-N11   | -100.5(7) | O8-N12 -C4-N11    | -27.7(13) |
| N8-N9-N10-C3   | 1.8(6)    | N4-C1-C1_a-N4_a   | 180.0(6)  |
| N9-N10-C3-C3_b | -179.3(5) | N1-C1-C1_a-N1_a   | -180.0(5) |
| N9-N10-C3-N7   | -0.7(7)   | N1-C1-C1_a -N4_a  | -1.7(9)   |
| O5-N11-C4-N8   | -177.8(9) | N4-C1 -C1_a-N1_a  | 1.7(9)    |
| O5-N11-C4-N12  | -56.8(11) | N7-C3-C3_b-N7_b   | -180.0(6) |
| O6-N11-C4-N8   | 8.4(12)   | N7-C3-C3_b-N10_b  | 1.5(9)    |
| O6-N11-C4-N12  | 129.5(11) | N10-C3-C3_b-N7_b  | -1.5(9)   |
| O7-N12-C4-N11  | 167.6(9)  | N10-C3-C3_b-N10_b | -180.0(5) |

**Table S7.** Hydrogen bonds of  $\beta$ -BDNBT

| D-H $\cdots$ A      | d(D-H)/Å | d(H $\cdots$ A)/ Å | d(D $\cdots$ A)/ Å | <(DHA)/° |
|---------------------|----------|--------------------|--------------------|----------|
| C2-H2A $\cdots$ N10 | 1        | 2.22               | 3.208(8)           | 170      |
| C4-H4A $\cdots$ N4  | 1        | 2.29               | 3.276(8)           | 167      |

**Table S8.** Selected bond lengths [Å] and angles [°] for compound 0.5 (4·2CH<sub>3</sub>OH)

| parameter | Å        | parameter | Å         |
|-----------|----------|-----------|-----------|
| Na1-O1    | 2.738(5) | N1-C1     | 1.353(7)  |
| Na1-O2    | 2.530(3) | N2-N3     | 1.341(8)  |
| Na1-O3    | 2.287(9) | N3-N4     | 1.342(7)  |
| Na1-O1_c  | 2.738(5) | N3-C2     | 1.402(10) |
| Na1-O2_c  | 2.530(3) | N4-C1     | 1.322(10) |
| Na1-N1_f  | 2.533(7) | N5-C2     | 1.373(5)  |
| Na1-O2_g  | 2.631(4) | C1-C1_a   | 1.438(9)  |
| Na1-O2_i  | 2.631(4) | C3-H3A    | 0.98      |
| O1-N5     | 1.242(5) | C3-H3B    | 0.98      |

|       |           |          |      |
|-------|-----------|----------|------|
| O2-N5 | 1.248(6)  | C3-H3C   | 0.98 |
| O3-C3 | 1.390(14) | C3-H3A_c | 0.98 |
| O3-H3 | 0.87(3)   | C3-H3B_c | 0.98 |
| N1-N2 | 1.296(9)  | C3-H3C_c | 0.98 |

---

| <b>parameter</b> | <b>Å</b>   | <b>parameter</b> | <b>Å</b>   |
|------------------|------------|------------------|------------|
| O1_c-Na1-O2      | 48.30(12)  | Na1-O1-N5        | 90.2(3)    |
| O1-Na1-O3        | 80.2(2)    | Na1-O2-N5        | 100.1(2)   |
| O1-Na1-O1_c      | 67.86(14)  | Na1-O2-Na1_h     | 107.42(14) |
| O1-Na1-O2_c      | 114.31(15) | Na1_h-O2-N5      | 134.3(2)   |
| O1-Na1-N1_f      | 114.59(16) | Na1-O3-C3        | 127.7(8)   |
| O1-Na1-O2_g      | 164.47(17) | C3-O3-H3         | 109.2(17)  |
| O1-Na1-O2_i      | 113.94(10) | Na1-O3-H3        | 123.1(16)  |
| O2-Na1-O3        | 100.28(12) | Na1_e-N1-N2      | 125.4(3)   |
| O1_c-Na1-O2      | 114.31(15) | N2-N1-C1         | 106.6(6)   |
| O2-Na1-O2_c      | 149.49(16) | Na1_e-N1-C1      | 128.0(5)   |
| O2-Na1-N1_f      | 83.76(11)  | N1-N2-N3         | 106.2(4)   |
| O2-Na1-O2_g      | 131.65(15) | N2-N3-C2         | 122.5(5)   |
| O2-Na1-O2_i      | 72.58(11)  | N4-N3-C2         | 124.3(5)   |
| O1_c-Na1-O3      | 80.2(2)    | N2-N3-N4         | 113.2(6)   |
| O2_c-Na1-O3      | 100.28(12) | N3-N4-C1         | 101.1(5)   |
| O3-Na1-N1_f      | 161.7(3)   | O1-N5-C2         | 117.6(5)   |
| O2_g-Na1-O3      | 84.9(2)    | O1-N5-O2         | 120.7(4)   |
| O2_i-Na1-O3      | 84.9(2)    | O2-N5-C2         | 121.8(4)   |
| O1_c-Na1-O2_c    | 48.30(12)  | N1-C1-C1_a       | 123.4(6)   |
| O1_c-Na1-N1_f    | 114.59(16) | N4-C1-C1_a       | 123.6(5)   |
| O1_c-Na1-O2_g    | 113.94(10) | N1-C1-N4         | 113.0(6)   |
| O1_c-Na1-O2_i    | 164.47(17) | N5-C2-N5_d       | 124.4(6)   |
| O2_c-Na1-N1_f    | 83.76(11)  | N3-C2-N5         | 116.1(3)   |

---

|               |            |                |          |
|---------------|------------|----------------|----------|
| O2_c-Na1-O2_g | 72.58(11)  | N3-C2-N5_d     | 116.1(3) |
| O2_c-Na1-O2_i | 131.65(15) | O3-C3-H3A      | 109      |
| O2_g-Na1-N1_f | 79.30(15)  | O3-C3-H3B      | 109      |
| O2_i-Na1-N1_f | 79.30(15)  | O3-C3-H3C      | 109      |
| O2_g-Na1-O2_i | 59.94(12)  | O3-C3-H3A_c    | 109      |
| O3-C3-H3B_c   | 109        | H3B-C3-H3B_c   | 140      |
| O3-C3-H3C_c   | 109        | H3B-C3-H3C_c   | 64       |
| H3A-C3-H3B    | 110        | H3A_c-C3-H3C   | 140      |
| H3A-C3-H3C    | 109        | H3B_c-C3-H3C   | 64       |
| H3A-C3-H3A_c  | 64         | H3C-C3-H3C_c   | 48       |
| H3A-C3-H3B_c  | 48         | H3A_c-C3-H3B_c | 110      |
| H3A-C3-H3C_c  | 140        | H3A_c-C3-H3C_c | 109      |
| H3B-C3-H3C    | 109        | H3B_c-C3-H3C_c | 109      |
| H3A_c-C3-H3B  | 48         |                |          |

**Table S9.** Torsion angles [°] of 0.5 (4·2CH<sub>3</sub>OH)

| <b>parameter</b> | <b>Å</b>  | <b>parameter</b> | <b>Å</b>   |
|------------------|-----------|------------------|------------|
| O2-Na1-O1-N5     | 5.0(2)    | O1-Na1-O3-C3     | 145.50(9)  |
| O3-Na1-O1-N5     | -108.4(3) | O2-Na1-O3-C3     | 101.34(12) |
| O1_c-Na1-O1-N5   | 168.3(3)  | Na1-O1-N5-O2     | -8.8(4)    |
| O2_c-Na1-O1-N5   | 154.7(2)  | Na1-O1-N5-C2     | 172.4(4)   |
| N1_f-Na1-O1-N5   | 60.4(3)   | Na1-O2-N5-O1     | 9.7(4)     |
| O2_i-Na1-O1-N5   | -28.5(3)  | Na1-O2-N5-C2     | -171.6(4)  |
| O1-Na1-O2-N5     | -5.0(2)   | Na1_h-O2-N5-O1   | 136.4(3)   |
| O1-Na1-O2-Na1_h  | -148.1(2) | Na1_h-O2-N5-C2   | -44.8(5)   |
| O3-Na1-O2-N5     | 61.8(3)   | C1-N1-N2-N3      | 0.00(2)    |
| O1_c-Na1-O2-N5   | -22.0(3)  | N2-N1-C1-N4      | 0.00(2)    |
| O2_c-Na1-O2-N5   | -69.8(4)  | N1-N2-N3-N4      | 0.00(2)    |
| N1_f-Na1-O2-N5   | -136.2(2) | N1-N2-N3-C2      | -180.00(2) |

|                 |          |               |           |
|-----------------|----------|---------------|-----------|
| O2_g-Na1-O2 -N5 | 154.1(2) | N2-N3-N4-C1   | 0.00(2)   |
| O2_i-Na1-O2-N5  | 143.1(2) | C2-N3-N4-C1   | 180.00(2) |
| N2-N3-C2-N5     | -80.2(4) | O1-N5-C2-N5_d | -168.4(5) |
| N4-N3-C2-N5     | 99.8(4)  | O2-N5-C2-N3   | 171.4(4)  |
| N3-N4-C1-N1     | 0.00(2)  | O2-N5-C2-N5_d | 12.8(8)   |
| O1-N5-C2-N3     | -9.8(6)  |               |           |

**Table S10.** Hydrogen bonds of 0.5 (4·2CH<sub>3</sub>OH)

| D-H···A     | d(D-H)/Å | d(H···A)/ Å | d(D···A)/ Å | <(DHA)/°  |
|-------------|----------|-------------|-------------|-----------|
| O3-H3···O1  | 0.87(3)  | 2.39(2)     | 3.008(9)    | 129.0(11) |
| C3-H3A···O1 | 0.98     | 2.57        | 3.224(14)   | 124       |

**Table S11.** Selected bond lengths [Å] and angles [°] for compound **5**

| parameter | Å        | parameter | Å        |
|-----------|----------|-----------|----------|
| O1-N6     | 1.241(2) | N2-C2     | 1.401(2) |
| O2-N6     | 1.242(2) | N3-N4     | 1.306(2) |
| O3-N5     | 1.239(2) | N4-C1     | 1.353(2) |
| O4-N5     | 1.232(2) | N5-C2     | 1.383(2) |
| N1-N2     | 1.334(2) | N6-C2     | 1.371(2) |
| N1-C1     | 1.322(2) | C1-C1_a   | 1.455(2) |
| N2-N3     | 1.335(2) |           |          |

| parameter  | Å          | parameter    | Å          |
|------------|------------|--------------|------------|
| N2-N1 -C1  | 100.99(13) | O1 -N6 -O2   | 121.34(14) |
| N1 -N2 -N3 | 113.82(14) | O1 -N6 -C2   | 117.33(14) |
| N1 -N2 -C2 | 123.98(14) | O2 -N6 -C2   | 121.33(14) |
| N3 -N2 -C2 | 122.01(14) | N1 -C1 -N4   | 113.08(14) |
| N2 -N3 -N4 | 105.90(14) | N1 -C1 -C1_a | 123.87(15) |
| N3 -N4 -C1 | 106.21(14) | N4 -C1 -C1_a | 123.05(14) |

|            |            |            |            |
|------------|------------|------------|------------|
| O3 -N5 -O4 | 121.72(16) | N2 -C2 -N5 | 116.71(14) |
| O3 -N5 -C2 | 116.86(14) | N2 -C2 -N6 | 117.38(14) |
| O4 -N5 -C2 | 121.40(15) | N5 -C2 -N6 | 125.84(14) |

**Table S12.** Torsion angles [°] of **5**

| parameter        | Å           | parameter          | Å           |
|------------------|-------------|--------------------|-------------|
| C1 -N1 -N2 -N3   | 0.02(18)    | O3 -N5 -C2 -N2     | -0.5(2)     |
| C1 -N1 -N2 -C2   | -175.10(15) | O3 -N5 -C2 -N6     | 176.41(17)  |
| N2 -N1 -C1 -N4   | 0.0(2)      | O4 -N5 -C2 -N2     | 178.10(19)  |
| N2 -N1 -C1 -C1_a | 179.40(15)  | O4 -N5 -C2 -N6     | -5.0(3)     |
| N1 -N2 -N3 -N4   | -0.04(19)   | O1 -N6 -C2 -N2     | -1.7(2)     |
| C2 -N2 -N3 -N4   | 175.18(15)  | O1 -N6 -C2 -N5     | -178.63(17) |
| N1 -N2 -C2 -N5   | 94.44(19)   | O2 -N6 -C2 -N2     | 177.67(16)  |
| N1 -N2 -C2 -N6   | -82.8(2)    | O2 -N6 -C2 -N5     | 0.7(3)      |
| N3 -N2 -C2 -N5   | -80.3(2)    | N1 -C1 -C1_a -N1_a | 180.00(15)  |
| N3 -N2 -C2 -N6   | 102.50(19)  | N1 -C1 -C1_a -N4_a | 0.7(3)      |
| N2 -N3 -N4 -C1   | 0.04(18)    | N4 -C1 -C1_a -N1_a | -0.7(3)     |
| N3 -N4 -C1 -N1   | 0.0(2)      | N4 -C1 -C1_a -N4_a | 180.00(16)  |
| N3 -N4 -C1 -C1_a | -179.43(15) |                    |             |

**Table S13.** Selected bond lengths [Å] and angles [°] for compound (**7**·2H<sub>2</sub>O)

| parameter | Å         | parameter  | Å       |
|-----------|-----------|------------|---------|
| O4A-N1A   | 1.31(2)   | O27-O27A   | 1.37(3) |
| O7A-N1A   | 1.254(17) | O27-O27A_b | 1.37(3) |
| O9-N13    | 1.242(6)  | O27-H27B_b | 0.87    |
| O10-N13   | 1.249(6)  | O27-H27B   | 0.87    |
| O11-N14   | 1.243(6)  | O27-H27A_b | 0.87    |
| O12-N14   | 1.241(7)  | O27-H27A   | 0.87    |
| O13-N44   | 1.245(17) | O27A-H27D  | 0.88    |
| O14-N23   | 1.283(14) | O27A-H27C  | 0.92    |



|          |           |           |           |
|----------|-----------|-----------|-----------|
| O15-N24  | 1.29(2)   | O27A-H27A | 0.77      |
| O16-N24  | 1.24(2)   | O25-O25_a | 1.464(9)  |
| O30-N44  | 1.30(3)   | O25-H25A  | 0.87      |
| O31-N23  | 1.277(19) | O25-H25B  | 0.87      |
| O1-N1    | 1.240(7)  | N1A-C9A   | 1.36(2)   |
| O2-N1    | 1.244(7)  | N13-C5    | 1.357(7)  |
| O3-N2    | 1.235(6)  | N14-C5    | 1.399(7)  |
| O4-N2    | 1.250(7)  | N15-N17   | 1.343(7)  |
| O5-N11   | 1.247(7)  | N15-N16   | 1.345(7)  |
| O6-N11   | 1.242(7)  | N15-C5    | 1.410(7)  |
| O7-N12   | 1.247(8)  | N16-C6    | 1.339(7)  |
| O8-N12   | 1.226(8)  | N17-N18   | 1.303(7)  |
| O17-N25  | 1.246(6)  | N18-C6    | 1.350(7)  |
| O18-N25  | 1.262(7)  | N19-C7    | 1.266(8)  |
| O19-N26  | 1.221(5)  | N19-N20   | 1.319(8)  |
| O20-N26  | 1.251(7)  | N20-N21   | 1.316(9)  |
| O21-N35  | 1.242(6)  | N20-C8    | 1.394(12) |
| O22-N35  | 1.234(5)  | N20-C9A   | 1.463(16) |
| O23-N36  | 1.249(7)  | N21-N22   | 1.316(8)  |
| O24-N36  | 1.239(7)  | N22-C7    | 1.392(8)  |
| N23-C8   | 1.337(15) | N29-C10   | 1.357(6)  |
| N24-C8   | 1.37(2)   | N30-C10   | 1.314(6)  |
| O26-O26A | 1.59(2)   | N31-N32   | 1.335(5)  |
| N44-C9A  | 1.376(19) | N31-C11   | 1.326(6)  |
| O26-H26B | 0.85      | N32-N33   | 1.346(6)  |
| O26-H26A | 0.8       | N32-C12   | 1.383(6)  |
| N1-C1    | 1.363(7)  | N33-N34   | 1.308(5)  |
| N2-C1    | 1.383(7)  | N34-C11   | 1.362(6)  |
| N3-N4    | 1.344(6)  | N35-C12   | 1.383(7)  |

---

|          |           |          |          |
|----------|-----------|----------|----------|
| N3-N6    | 1.348(5)  | N36-C12  | 1.369(7) |
| N3-C1    | 1.381(6)  | C6-C7    | 1.424(8) |
| N4-N5    | 1.309(5)  | C2-C3    | 1.453(7) |
| N5-C2    | 1.356(6)  | N37-N38  | 1.445(7) |
| N6-C2    | 1.309(6)  | N37-H37B | 0.99     |
| N7-C3    | 1.311(6)  | N37-H37A | 0.88     |
| N7-N8    | 1.333(5)  | N38-H38C | 0.91     |
| N8-N9    | 1.336(6)  | N38-H38A | 0.91     |
| N8-C4    | 1.385(6)  | N38-H38B | 0.91     |
| N9-N10   | 1.306(5)  | C10-C11  | 1.450(7) |
| N10-C3   | 1.358(6)  | N39-N40  | 1.427(7) |
| N11-C4   | 1.363(7)  | N39-H39A | 0.91     |
| N12-C4   | 1.384(8)  | N39-H39B | 0.91     |
| N25-C9   | 1.371(7)  | N39-H39C | 0.91     |
| N26-C9   | 1.382(7)  | N40-H40A | 0.88     |
| N27-N28  | 1.330(6)  | N40-H40B | 0.88     |
| N27-N30  | 1.341(5)  | N41-N42  | 1.394(8) |
| N27-C9   | 1.395(6)  | N41-H41A | 0.88     |
| N28-N29  | 1.301(5)  | N41-H41B | 0.88     |
| N23-C8   | 1.337(15) | N29-C10  | 1.357(6) |
| N24-C8   | 1.37(2)   | N30-C10  | 1.314(6) |
| O26-O26A | 1.59(2)   | N31-N32  | 1.335(5) |
| N44-C9A  | 1.376(19) | N31-C11  | 1.326(6) |
| O26-H26B | 0.85      | N32-N33  | 1.346(6) |
| O26-H26A | 0.8       | N32-C12  | 1.383(6) |
| N1-C1    | 1.363(7)  | N33-N34  | 1.308(5) |
| N2-C1    | 1.383(7)  | N34-C11  | 1.362(6) |
| N3-N4    | 1.344(6)  | N35-C12  | 1.383(7) |
| N3-N6    | 1.348(5)  | N36-C12  | 1.369(7) |

---

|         |          |          |          |
|---------|----------|----------|----------|
| N3-C1   | 1.381(6) | C6-C7    | 1.424(8) |
| N4-N5   | 1.309(5) | C2-C3    | 1.453(7) |
| N5-C2   | 1.356(6) | N37-N38  | 1.445(7) |
| N6-C2   | 1.309(6) | N37-H37B | 0.99     |
| N7-C3   | 1.311(6) | N37-H37A | 0.88     |
| N7-N8   | 1.333(5) | N38-H38C | 0.91     |
| N8-N9   | 1.336(6) | N38-H38A | 0.91     |
| N8-C4   | 1.385(6) | N38-H38B | 0.91     |
| N9-N10  | 1.306(5) | C10-C11  | 1.450(7) |
| N10-C3  | 1.358(6) | N39-N40  | 1.427(7) |
| N11-C4  | 1.363(7) | N39-H39A | 0.91     |
| N12-C4  | 1.384(8) | N39-H39B | 0.91     |
| N25-C9  | 1.371(7) | N39-H39C | 0.91     |
| N26-C9  | 1.382(7) | N40-H40A | 0.88     |
| N27-N28 | 1.330(6) | N40-H40B | 0.88     |
| N27-N30 | 1.341(5) | N41-N42  | 1.394(8) |
| N27-C9  | 1.395(6) | N41-H41A | 0.88     |
| N28-N29 | 1.301(5) | N41-H41B | 0.88     |

| <b>parameter</b>  | <b>Å</b> | <b>parameter</b> | <b>Å</b> |
|-------------------|----------|------------------|----------|
| O27A_b-O27-H27B   | 92       | O12-N14-C5       | 117.0(5) |
| O27A-O27-H27A_b   | 149      | O11-N14-O12      | 122.6(5) |
| O27A-O27-H27B_b   | 92       | N16-N15-C5       | 123.7(5) |
| H27A_b-O27-H27B_b | 105      | N17-N15-C5       | 122.3(5) |
| O27A_b-O27-H27A_b | 31       | N16-N15-N17      | 113.8(5) |
| O27A_b-O27-H27B_b | 88       | N15-N16-C6       | 100.4(4) |
| H27A-O27-H27B_b   | 75       | N15-N17-N18      | 105.9(5) |
| O27A_b-O27-H27A   | 149      | N17-N18-C6       | 106.9(5) |
| O27A-O27-H27B     | 88       | N20-N19-C7       | 104.0(6) |

|                 |           |               |           |
|-----------------|-----------|---------------|-----------|
| H27A_b-O27-H27B | 75        | N21-N20-C8    | 121.5(7)  |
| H27A-O27-H27B   | 105       | N19-N20-C8    | 122.1(7)  |
| O27A-O27-H27A   | 31        | N19-N20-C9A   | 126.7(9)  |
| H27A-O27-H27A_b | 180       | N19-N20-N21   | 113.1(5)  |
| H27B-O27-H27B_b | 180       | N21-N20-C9A   | 115.9(8)  |
| O27-O27A-H27A   | 36        | N20-N21-N22   | 106.4(5)  |
| H27A-O27A-H27D  | 162       | N21-N22-C7    | 104.4(5)  |
| H27C-O27A-H27D  | 104       | O14-N23-C8    | 120.3(10) |
| H27A-O27A-H27C  | 77        | O31-N23-C8    | 123.2(11) |
| H25A-O25-H25B   | 104       | O14-N23-O31   | 116.4(11) |
| O25_a-O25-H25A  | 116       | O15-N24-C8    | 114.6(17) |
| O25_a-O25-H25B  | 110       | O15-N24-O16   | 122.3(18) |
| O4A-N1A-C9A     | 114.2(13) | O16-N24-C8    | 122.6(19) |
| O4A-N1A-O7A     | 118.5(17) | O30-N44-C9A   | 111.1(16) |
| O7A-N1A-C9A     | 127.3(17) | O13-N44-C9A   | 127.0(14) |
| O9-N13-O10      | 120.8(5)  | O13-N44-O30   | 122.0(17) |
| O10-N13-C5      | 121.1(5)  | H26A-O26-H26B | 112       |
| O9-N13-C5       | 118.2(5)  | O2-N1-C1      | 121.8(5)  |
| O11-N14-C5      | 120.4(5)  | O1-N1-C1      | 116.9(5)  |
| O1-N1-O2        | 121.3(5)  | N30-N27-C9    | 123.5(4)  |
| O4-N2-C1        | 116.2(5)  | N28-N27-C9    | 122.7(4)  |
| O3-N2-C1        | 121.9(5)  | N28-N27-N30   | 113.7(4)  |
| O3-N2-O4        | 121.9(5)  | N27-N28-N29   | 105.9(4)  |
| N4-N3-N6        | 113.1(3)  | N28-N29-C10   | 106.5(4)  |
| N6-N3-C1        | 124.0(4)  | N27-N30-C10   | 101.1(4)  |
| N4-N3-C1        | 122.6(4)  | N32-N31-C11   | 101.4(4)  |
| N3-N4-N5        | 106.1(3)  | N33-N32-C12   | 122.6(4)  |
| N4-N5-C2        | 105.8(4)  | N31-N32-N33   | 113.6(3)  |
| N3-N6-C2        | 101.0(4)  | N31-N32-C12   | 123.8(4)  |

---

|             |           |              |           |
|-------------|-----------|--------------|-----------|
| N8-N7-C3    | 101.5(4)  | N32-N33-N34  | 105.9(3)  |
| N7-N8-N9    | 113.1(3)  | N33-N34-C11  | 106.4(4)  |
| N7-N8-C4    | 123.0(4)  | O22-N35-C12  | 121.6(4)  |
| N9-N8-C4    | 123.8(4)  | O21-N35-C12  | 116.5(4)  |
| N8-N9-N10   | 106.5(3)  | O21-N35-O22  | 121.8(5)  |
| N9-N10-C3   | 105.5(4)  | O23-N36-C12  | 116.8(5)  |
| O6-N11-C4   | 120.9(5)  | O23-N36-O24  | 121.8(5)  |
| O5-N11-O6   | 122.3(5)  | O24-N36-C12  | 121.4(5)  |
| O5-N11-C4   | 116.8(5)  | N14-C5-N15   | 115.0(5)  |
| O7-N12-O8   | 123.7(6)  | N13-C5-N14   | 126.6(5)  |
| O7-N12-C4   | 115.3(5)  | N13-C5-N15   | 116.9(5)  |
| O8 -N12-C4  | 121.0(6)  | N16-C6-C7    | 123.6(5)  |
| O17-N25-O18 | 120.5(5)  | N18-C6-C7    | 123.4(5)  |
| O17-N25-C9  | 121.8(5)  | N16-C6-N18   | 113.0(5)  |
| O18-N25-C9  | 117.7(5)  | N19-C7-N22   | 112.1(5)  |
| O20-N26-C9  | 115.6(4)  | N19-C7-C6    | 125.4(5)  |
| O19-N26-O20 | 122.1(5)  | N22-C7-C6    | 122.4(5)  |
| O19-N26-C9  | 122.3(5)  | N20-C8-N24   | 127.4(12) |
| N23-C8-N24  | 124.5(13) | N26-C9-N27   | 117.1(4)  |
| N20-C8-N23  | 104.3(9)  | N29-C10-N30  | 112.8(4)  |
| N1A-C9A-N44 | 116.9(14) | N29-C10-C11  | 123.8(4)  |
| N1A-C9A-N20 | 131.9(13) | N30-C10-C11  | 123.3(4)  |
| N20-C9A-N44 | 110.7(12) | N31-C11-N34  | 112.7(4)  |
| N1-C1-N3    | 117.5(5)  | N31-C11-C10  | 124.3(4)  |
| N2-C1-N3    | 117.2(5)  | N34-C11-C10  | 122.9(4)  |
| N1-C1-N2    | 125.1(5)  | N32-C12-N35  | 116.9(4)  |
| N5-C2-N6    | 114.0(4)  | N32-C12-N36  | 118.6(5)  |
| N5-C2-C3    | 122.4(4)  | N35-C12-N36  | 124.4(5)  |
| N6-C2-C3    | 123.6(4)  | N40-N39-H39A | 110       |

---

|               |          |                   |     |
|---------------|----------|-------------------|-----|
| N7-C3-N10     | 113.4(4) | N40-N39-H39B      | 109 |
| N7-C3-C2      | 123.8(4) | N40-N39-H39C      | 109 |
| N10-C3-C2     | 122.8(4) | H39A-N39-H39B     | 110 |
| N11-C4-N12    | 123.9(5) | H39A-N39-H39C     | 110 |
| N8-C4-N12     | 117.5(5) | H39B-N39-H39C     | 109 |
| N8-C4-N11     | 118.3(5) | N39-N40-H40A      | 109 |
| N38-N37-H37A  | 109      | N39-N40-H40B      | 109 |
| N38-N37-H37B  | 89       | H40A-N40-H40B     | 109 |
| H37A-N37-H37B | 90       | N42-N41-H41A      | 110 |
| H38A-N38-H38C | 110      | N42-N41-H41B      | 108 |
| H38B-N38-H38C | 109      | H41A-N41-H41B     | 109 |
| H38A-N38-H38B | 109      | N41-N42-H42A      | 110 |
| N37-N38-H38A  | 109      | N41-N42-H42B      | 110 |
| N37-N38-H38B  | 109      | N41-N42-H42C      | 110 |
| N37-N38-H38C  | 109      | H42A-N42-H42B     | 109 |
| N25-C9-N26    | 124.4(5) | H42A-N42-H42C     | 109 |
| N25-C9-N27    | 118.2(5) | H42B-N42-H42C     | 109 |
| N46-N45-H45A  | 110      | N49-N50-H50B      | 110 |
| N46-N45-H45B  | 110      | H29A_c-O29-H29B   | 119 |
| H45A-N45-H45B | 108      | H29A-O29-H29B_c   | 119 |
| N45-N46-H46A  | 109      | H29A-O29-H29B     | 107 |
| N45-N46-H46B  | 109      | H29B-O29-H29B_c   | 132 |
| N45-N46-H46C  | 109      | H29A_c-O29-H29B_c | 107 |
| H46A-N46-H46B | 110      | H29A-O29-H29A_c   | 32  |
| H46A-N46-H46C | 109      | H43A-N43-H43C     | 109 |
| H46B-N46-H46C | 110      | N51-N43-H43A      | 110 |
| H28A-O28-H28B | 105      | N51-N43-H43B      | 110 |
| N48-N47-H47B  | 110      | N51-N43-H43C      | 110 |
| N48-N47-H47C  | 110      | H43B-N43-H43C     | 109 |

---

|                |     |                |     |
|----------------|-----|----------------|-----|
| H47A-N47-H47B  | 109 | H43A-N43-H43B  | 109 |
| H47A-N47-H47C  | 109 | N43-N51-H51B   | 110 |
| H47B-N47-H47C  | 109 | H51A-N51-H51B  | 108 |
| N48-N47-H47A   | 109 | N43-N51-H51A   | 111 |
| N47-N48-H48A   | 111 | N48A-N47A-H47E | 109 |
| H48A-N48-H48B  | 109 | N48A-N47A-H47F | 109 |
| N47-N48-H48B   | 110 | N48A-N47A-H47D | 110 |
| H28C-O28A-H28D | 105 | H47D-N47A-H47E | 110 |
| N50-N49-H49B   | 109 | H47D-N47A-H47F | 109 |
| N50-N49-H49A   | 110 | H47E-N47A-H47F | 109 |
| H49A-N49-H49C  | 110 | N47A-N48A-H48C | 110 |
| N50-N49-H49C   | 110 | N47A-N48A-H48D | 110 |
| H49A-N49-H49B  | 109 | H48C-N48A-H48D | 109 |
| H49B-N49-H49C  | 109 | N50A-N49A-H49D | 109 |
| H50A-N50-H50B  | 108 | N50A-N49A-H49F | 109 |
| N49-N50-H50A   | 109 | H49D-N49A-H49E | 110 |
| H49D-N49A-H49F | 110 | N49A-N50A-H50D | 119 |
| H49E-N49A-H49F | 110 | H50C-N50A-H50D | 103 |
| N50A-N49A-H49E | 109 | N49A-N50A-H50C | 112 |

**Table S14.** Torsion angles [°] of 7·2H<sub>2</sub>O

| <b>parameter</b> | <b>Å</b>  | <b>parameter</b> | <b>Å</b>  |
|------------------|-----------|------------------|-----------|
| O9-N13-C5-N14    | -167.6(5) | N7-N8-C4-N11     | 74.5(7)   |
| O10-N13-C5-N14   | 13.9(9)   | N9-N8-C4-N11     | -106.4(6) |
| O9-N13-C5-N15    | -2.2(7)   | N7-N8-C4-N12     | -100.0(6) |
| O10-N13-C5-N15   | 179.3(5)  | C4-N8-N9-N10     | -179.4(5) |
| O11-N14-C5-N15   | -167.3(5) | N8-N9-N10-C3     | -0.4(6)   |
| O12-N14-C5-N15   | 11.1(7)   | N9-N10-C3-C2     | -176.8(5) |
| O12-N14-C5-N13   | 176.7(5)  | N9-N10-C3-N7     | 1.1(6)    |

|                 |           |                 |           |
|-----------------|-----------|-----------------|-----------|
| O11-N14-C5-N13  | -1.7(9)   | O5-N11-C4-N12   | 178.5(5)  |
| N17-N15-N16-C6  | -1.4(6)   | O6-N11-C4-N8    | -172.7(5) |
| C5-N15-N16-C6   | -177.2(5) | O6-N11-C4-N12   | 1.5(8)    |
| C5-N15-N17-N18  | 177.9(5)  | O5-N11-C4-N8    | 4.4(7)    |
| N17-N15-C5-N13  | 82.1(7)   | O8-N12-C4-N11   | 10.1(9)   |
| N16-N15-C5-N14  | 64.6(7)   | O7-N12-C4-N8    | 4.5(7)    |
| N17-N15-C5-N14  | -110.8(6) | O7-N12-C4-N11   | -169.7(5) |
| N16-N15-N17-N18 | 2.0(6)    | O8-N12-C4-N8    | -175.8(5) |
| N16-N15-C5-N13  | -102.4(6) | O17-N25-C9-N27  | -179.6(4) |
| N15-N16-C6-N18  | 0.3(6)    | O17-N25-C9-N26  | 6.2(8)    |
| N15-N16-C6-C7   | -179.3(5) | O18-N25-C9-N27  | 1.7(7)    |
| N15-N17-N18-C6  | -1.6(6)   | O18-N25-C9-N26  | -172.5(5) |
| N17-N18-C6-N16  | 0.9(6)    | O20-N26-C9-N27  | -1.9(6)   |
| N17-N18-C6-C7   | -179.5(5) | O20-N26-C9-N25  | 172.3(5)  |
| C7-N19-N20-N21  | -0.8(8)   | O19-N26-C9-N27  | 178.7(4)  |
| C7-N19-N20-C8   | 159.0(8)  | O19-N26-C9-N25  | -7.1(7)   |
| N20-N19-C7-N22  | 1.1(7)    | N30-N27-N28-N29 | 0.3(6)    |
| N20-N19-C7-C6   | 178.5(6)  | N28-N27-C9-N26  | -87.4(6)  |
| N19-N20-N21-N22 | 0.2(8)    | N30-N27-C9-N26  | 87.6(6)   |
| N19-N20-C8-N24  | -48(2)    | N30-N27-C9-N25  | -87.0(7)  |
| N19-N20-C8-N23  | 110.4(9)  | N28-N27-C9-N25  | 98.0(6)   |
| N21-N20-C8-N23  | -91.6(10) | N28-N27-N30-C10 | -0.5(6)   |
| C8-N20-N21-N22  | -159.7(7) | C9-N27-N28-N29  | 175.8(5)  |
| N21-N20-C8-N24  | 110.1(17) | C9-N27-N30-C10  | -176.0(5) |
| N20-N21-N22-C7  | 0.5(7)    | N27-N28-N29-C10 | 0.0(6)    |
| N21-N22-C7-C6   | -178.5(5) | N28-N29-C10-N30 | -0.4(6)   |
| N21-N22-C7-N19  | -1.0(7)   | N28-N29-C10-C11 | 178.6(5)  |
| O31-N23-C8-N24  | 165.9(17) | N27-N30-C10-N29 | 0.6(6)    |
| O14-N23-C8-N20  | -178.6(9) | N27-N30-C10-C11 | -178.4(5) |

---



|                |            |                 |           |
|----------------|------------|-----------------|-----------|
| O31-N23-C8-N20 | 6.7(16)    | N32-N31-C11-N34 | -1.0(6)   |
| O14-N23-C8-N24 | -19(2)     | N32-N31-C11-C10 | -176.9(5) |
| O16-N24-C8-N20 | 166.7(16)  | C11-N31-N32-N33 | 1.8(6)    |
| O15-N24-C8-N23 | -176.4(14) | C11-N31-N32-C12 | 179.2(5)  |
| O15-N24-C8-N20 | -22(3)     | N33-N32-C12-N35 | -103.4(6) |
| O16-N24-C8-N23 | 12(3)      | N33-N32-C12-N36 | 78.5(7)   |
| O2-N1-C1-N2    | -9.6(9)    | N31-N32-N33-N34 | -1.9(6)   |
| O2-N1-C1-N3    | 175.0(5)   | N31-N32-C12-N35 | 79.5(7)   |
| O1-N1-C1-N3    | -4.3(7)    | C12-N32-N33-N34 | -179.4(5) |
| O1-N1-C1-N2    | 171.2(5)   | N31-N32-C12-N36 | -98.6(6)  |
| O3-N2-C1-N1    | 1.8(8)     | N32-N33-N34-C11 | 1.1(6)    |
| O3-N2-C1-N3    | 177.2(5)   | N33-N34-C11-C10 | 175.9(5)  |
| O4-N2-C1-N3    | -1.5(7)    | N33-N34-C11-N31 | 0.0(6)    |
| O4-N2-C1-N1    | -176.9(5)  | O21-N35-C12-N36 | 177.6(5)  |
| N6-N3-C1-N1    | 100.2(6)   | O22-N35-C12-N36 | -0.6(7)   |
| N4-N3-C1-N2    | 110.3(6)   | O21-N35-C12-N32 | -0.4(6)   |
| N6-N3-C1-N2    | -75.6(7)   | O22-N35-C12-N32 | -178.5(4) |
| C1-N3-N6-C2    | -175.4(5)  | O23-N36-C12-N32 | 2.2(7)    |
| N6-N3-N4-N5    | 0.7(6)     | O24-N36-C12-N32 | -179.3(5) |
| C1-N3-N4-N5    | 175.4(5)   | O24-N36-C12-N35 | 2.8(8)    |
| N4-N3-C1-N1    | -73.9(7)   | O23-N36-C12-N35 | -175.7(5) |
| N4-N3-N6-C2    | -0.8(6)    | N16-C6-C7-N19   | -177.2(6) |
| N3-N4-N5-C2    | -0.3(6)    | N18-C6-C7-N22   | -179.7(5) |
| N4-N5-C2-N6    | -0.3(7)    | N16-C6-C7-N22   | 0.0(8)    |
| N4-N5-C2-C3    | -179.4(5)  | N18-C6-C7-N19   | 3.2(9)    |
| N3-N6-C2-N5    | 0.7(6)     | N5-C2-C3-N7     | 5.2(8)    |
| N3-N6-C2-C3    | 179.8(5)   | N5-C2-C3-N10    | -177.1(5) |
| C3-N7-N8-N9    | 0.9(6)     | N6-C2-C3-N10    | 3.9(8)    |
| C3-N7-N8-C4    | -180.0(5)  | N6-C2-C3-N7     | -173.8(5) |

---

|              |          |                 |          |
|--------------|----------|-----------------|----------|
| N8-N7-C3-N10 | -1.2(6)  | N29-C10-C11-N31 | -4.9(8)  |
| N8-N7-C3-C2  | 176.7(5) | N30-C10-C11-N31 | 174.0(5) |
| N7-N8-N9-N10 | -0.3(6)  | N30-C10-C11-N34 | -1.5(8)  |
| N9-N8-C4-N12 | 79.1(7)  | N29-C10-C11-N34 | 179.6(5) |

**Table S15.** Hydrogen bonds of 7·2H<sub>2</sub>O

| <b>D-H···A</b> | <b>d(D-H)/Å</b> | <b>d(H···A)/ Å</b> | <b>d(D···A)/ Å</b> | <b>&lt;(DHA)/°</b> |
|----------------|-----------------|--------------------|--------------------|--------------------|
| O25-H25A···O15 | 0.87            | 2.19               | 2.722(11)          | 119                |
| O25-H25A···N34 | 0.87            | 2.33               | 3.103(7)           | 148                |
| O26-H26A···N42 | 0.8             | 2.27               | 2.80(2)            | 123                |
| O28-H28A···O29 | 0.87            | 1.84               | 2.683(19)          | 164                |
| O28-H28B···N10 | 0.87            | 2.21               | 3.053(11)          | 164                |
| O28A-H28D···O2 | 0.87            | 2.19               | 2.689(16)          | 116                |
| O28A-H28D···O3 | 0.87            | 2.42               | 3.164(16)          | 143                |
| O29-H29A···O28 | 0.86            | 1.92               | 2.683(19)          | 147                |
| N37-H37A···O22 | 0.88            | 2.37               | 2.923(6)           | 121                |
| N38-H38A···N29 | 0.91            | 2.39               | 3.204(7)           | 149                |
| N38-H38C···N46 | 0.91            | 2.41               | 3.155(12)          | 139                |
| N40-H40B···N37 | 0.88            | 2.09               | 2.803(7)           | 137                |
| N41-H41A···O14 | 0.88            | 2.53               | 3.090(11)          | 122                |
| N41-H41A···O23 | 0.88            | 2.56               | 3.280(7)           | 140                |
| N42-H42A···O14 | 0.91            | 2.52               | 2.983(11)          | 112                |
| N42-H42A···O26 | 0.91            | 1.91               | 2.80(2)            | 163                |
| N42-H42C···O7  | 0.91            | 2.53               | 3.292(9)           | 142                |
| N45-H45A···N39 | 0.89            | 2.31               | 2.954(16)          | 128                |
| N45-H45B···O22 | 0.89            | 2.1                | 2.946(16)          | 159                |
| N46-H46A···O5  | 0.91            | 2.27               | 3.053(12)          | 143                |
| N46-H46B···N38 | 0.91            | 2.49               | 3.155(12)          | 130                |
| N47-H47A···O29 | 0.91            | 1.68               | 2.570(12)          | 167                |

|                |      |      |           |     |
|----------------|------|------|-----------|-----|
| N47-H47B...N19 | 0.91 | 2.45 | 3.301(12) | 155 |
| N48-H48A...N50 | 0.88 | 2.29 | 3.13(2)   | 160 |
| N48-H48B...O3  | 0.88 | 2.28 | 3.046(14) | 145 |
| N49-H49B...O25 | 0.91 | 1.83 | 2.724(12) | 165 |
| N50-H50B...N48 | 0.89 | 2.28 | 3.13(2)   | 161 |

**Table S16.** Selected bond lengths [Å] and angles [°] for **9**

| parameter | Å         | parameter | Å        |
|-----------|-----------|-----------|----------|
| O5 -N17   | 1.255(15) | N18A -C7A | 1.37(3)  |
| O5A-N17A  | 1.27(3)   | N1 -C1    | 1.302(7) |
| O6 -N17   | 1.250(13) | N1 -N2    | 1.337(6) |
| O6A-N17A  | 1.25(2)   | N2 -C2    | 1.395(8) |
| O7 -N18   | 1.257(17) | N2 -N3    | 1.350(6) |
| O7A-N18A  | 1.24(3)   | N3 -N4    | 1.299(7) |
| O8 -N18   | 1.261(11) | N4 -C1    | 1.364(6) |
| O8A-N18A  | 1.24(3)   | N5 -C2    | 1.372(7) |
| O1 -N5    | 1.265(6)  | N6 -C2    | 1.374(8) |
| O2 -N5    | 1.251(7)  | N7 -C3    | 1.295(8) |
| O3 -N6    | 1.233(6)  | N8 -N9    | 1.389(8) |
| O4 -N6    | 1.255(7)  | N8 -C3    | 1.335(8) |
| O10-C8    | 1.216(19) | N9 -C4    | 1.275(7) |
| O10-H10   | 0.83      | N10-N11   | 1.391(6) |
| O9 -H9B_c | 0.86      | N10-C4    | 1.366(7) |
| O9 -H9B   | 0.86      | N10-C3    | 1.352(7) |
| O9 -H9A   | 0.86      | N12-C5    | 1.478(8) |
| O9 -H9A_c | 0.86      | N7 -H7A   | 0.87     |
| N13-N14   | 1.357(8)  | N7 -H7B   | 0.87     |
| N13-C6    | 1.311(6)  | N8 -H8    | 0.87     |
| N14-N15   | 1.323(6)  | N11-H11A  | 0.87     |

|           |           |          |          |
|-----------|-----------|----------|----------|
| N14-C7A   | 1.41(3)   | N11-H11B | 0.87     |
| N14-C7    | 1.435(14) | N12-H12B | 0.9      |
| N15-N16   | 1.308(7)  | N12-H12A | 0.9      |
| N16-C6    | 1.353(7)  | N12-H12C | 0.9      |
| N17-C7    | 1.378(18) | C6 -C6_b | 1.457(7) |
| N17A -C7A | 1.38(3)   | C1 -C1_a | 1.471(7) |
| N18-C7    | 1.374(17) | C4 -C5   | 1.489(8) |
| C5 -H5B   | 0.98      | C8 -H8C  | 0.97     |
| C5 -H5A   | 0.98      | C8 -H8A  | 0.97     |
| C8 -H8B   | 0.97      |          |          |

---

| <b>parameter</b> | <b>Å</b>  | <b>parameter</b> | <b>Å</b> |
|------------------|-----------|------------------|----------|
| C8 -O10-H10      | 110       | N1 -N2 -C2       | 122.9(5) |
| H9A-O9 -H9A_c    | 75        | N3 -N2 -C2       | 123.4(5) |
| H9A-O9 -H9B_c    | 135       | N1 -N2 -N3       | 113.6(5) |
| H9A_c-O9 -H9B    | 135       | N2 -N3 -N4       | 105.3(4) |
| H9B-O9 -H9B_c    | 106       | N3 -N4 -C1       | 106.4(4) |
| H9A_c-O9-H9B_c   | 104       | O1 -N5 -C2       | 116.8(5) |
| H9A-O9 -H9B      | 104       | O2 -N5 -C2       | 121.5(5) |
| N14-N13-C6       | 100.1(4)  | O1 -N5 -O2       | 121.6(4) |
| N13-N14-C7       | 120.6(7)  | O3 -N6 -O4       | 122.2(5) |
| N15-N14-C7A      | 115.2(12) | O4 -N6 -C2       | 120.6(5) |
| N13-N14-C7A      | 129.5(12) | O3 -N6 -C2       | 117.2(5) |
| N15-N14-C7       | 123.4(7)  | N9 -N8 -C3       | 113.0(5) |
| N13-N14-N15      | 114.0(4)  | N8 -N9 -C4       | 102.4(5) |
| N14-N15-N16      | 105.9(5)  | N11-N10-C4       | 124.1(4) |
| N15-N16-C6       | 106.0(4)  | C3 -N10-C4       | 107.0(4) |
| O5 -N17-C7       | 115.2(11) | N11-N10-C3       | 128.8(5) |
| O5 -N17-O6       | 121.7(12) | C3 -N7 -H7A      | 120      |

---

|                |           |                |          |
|----------------|-----------|----------------|----------|
| O6 -N17-C7     | 123.2(11) | H7A-N7 -H7B    | 120      |
| O5A-N17A -C7A  | 120.9(19) | C3 -N7 -H7B    | 120      |
| O5A-N17A -O6A  | 121(2)    | C3 -N8 -H8     | 124      |
| O6A-N17A -C7A  | 118(2)    | N9 -N8 -H8     | 123      |
| O8 -N18-C7     | 120.7(11) | N10-N11-H11A   | 109      |
| O7 -N18-C7     | 116.0(10) | N10-N11-H11B   | 110      |
| O7 -N18-O8     | 123.3(11) | H11A -N11-H11B | 109      |
| O7A-N18A -O8A  | 126(2)    | C5 -N12-H12B   | 109      |
| O8A-N18A -C7A  | 119(2)    | H12B -N12-H12C | 109      |
| O7A-N18A -C7A  | 112(2)    | H12A -N12-H12B | 109      |
| N2 -N1 -C1     | 101.3(4)  | H12A-N12-H12C  | 109      |
| C5 -N12-H12A   | 109       | N8 -C3 -N10    | 104.2(5) |
| C5 -N12-H12C   | 110       | N7 -C3 -N10    | 126.1(6) |
| N16-C6 -C6_b   | 122.6(4)  | N9 -C4 -C5     | 125.0(5) |
| N13-C6 -C6_b   | 123.4(5)  | N10-C4 -C5     | 121.6(5) |
| N13-C6 -N16    | 114.0(5)  | N9 -C4 -N10    | 113.4(5) |
| N17-C7 -N18    | 125.2(12) | N12-C5 -C4     | 109.4(5) |
| N14-C7 -N17    | 120.4(11) | H5A-C5 -H5B    | 108      |
| N14-C7 -N18    | 114.2(10) | N12-C5 -H5A    | 110      |
| N17A -C7A-N18A | 128(2)    | C4 -C5 -H5B    | 110      |
| N14-C7A-N17A   | 103.5(17) | C4 -C5 -H5A    | 110      |
| N14-C7A-N18A   | 128(2)    | N12-C5 -H5B    | 110      |
| N4 -C1 -C1_a   | 122.4(5)  | H8B-C8 -H8C    | 109      |
| N1 -C1 -N4     | 113.4(5)  | O10-C8 -H8A    | 109      |
| N1 -C1 -C1_a   | 124.1(4)  | O10-C8 -H8B    | 110      |
| N5 -C2 -N6     | 126.2(5)  | O10-C8 -H8C    | 109      |
| N2 -C2 -N6     | 116.6(5)  | H8A-C8 -H8B    | 110      |
| N2 -C2 -N5     | 116.5(5)  | H8A-C8 -H8C    | 109      |
| N7 -C3 -N8     | 129.7(6)  |                |          |

---

**Table S17.** Torsion angles [°] of **9**

| <b>parameter</b> | <b>Å</b>   | <b>parameter</b>    | <b>Å</b>  |
|------------------|------------|---------------------|-----------|
| C6 -N13-N14-N15  | -0.8(6)    | N3 -N4 -C1 -C1_a    | 178.0(4)  |
| C6 -N13-N14-C7   | -165.2(7)  | O2 -N5 -C2 -N2      | -176.2(5) |
| N14-N13-C6 -N16  | 0.4(6)     | O1 -N5 -C2 -N6      | 174.5(5)  |
| N14-N13-C6 -C6_b | 178.1(5)   | O1 -N5 -C2 -N2      | 4.9(7)    |
| N15-N14-C7 -N17  | -89.0(13)  | O2 -N5 -C2 -N6      | -6.6(8)   |
| N13-N14-N15-N16  | 0.9(7)     | O4 -N6 -C2 -N5      | 0.4(8)    |
| C7 -N14-N15-N16  | 164.8(8)   | O3 -N6 -C2 -N5      | -179.9(5) |
| N13-N14-C7 -N17  | 73.9(13)   | O4 -N6 -C2 -N2      | 170.1(5)  |
| N13-N14-C7 -N18  | -110.6(10) | O3 -N6 -C2 -N2      | -10.2(7)  |
| N15-N14-C7 -N18  | 86.6(12)   | C3 -N8 -N9 -C4      | -1.6(6)   |
| N14-N15-N16-C6   | -0.5(6)    | N9 -N8 -C3 -N7      | -178.3(6) |
| N15-N16-C6 -N13  | 0.1(6)     | N9 -N8 -C3 -N10     | 1.5(7)    |
| N15-N16-C6 -C6_b | -177.6(5)  | N8 -N9 -C4 -N10     | 1.1(6)    |
| O5 -N17-C7 -N14  | -6.2(17)   | N8 -N9 -C4 -C5      | 179.9(5)  |
| O6 -N17-C7 -N14  | 175.4(10)  | N11-N10-C3 -N8      | 177.1(5)  |
| O5 -N17-C7 -N18  | 178.7(12)  | C4 -N10-C3 -N8      | -0.7(6)   |
| O6 -N17-C7 -N18  | 0(2)       | N11-N10-C4 -N9      | -178.2(5) |
| O8 -N18-C7 -N17  | -1.1(18)   | N11-N10-C3 -N7      | -3.1(10)  |
| O7 -N18-C7 -N14  | 5.7(15)    | C4 -N10-C3 -N7      | 179.1(6)  |
| O8 -N18-C7 -N14  | -176.4(8)  | C3 -N10-C4 -C5      | -179.1(5) |
| O7 -N18-C7 -N17  | -179.0(12) | C3 -N10-C4 -N9      | -0.3(6)   |
| C1 -N1 -N2 -C2   | 179.6(5)   | N11-N10-C4 -C5      | 2.9(8)    |
| C1 -N1 -N2 -N3   | 0.4(6)     | N16-C6 -C6_b -N13_b | -2.6(7)   |
| N2 -N1 -C1 -C1_a | -178.7(5)  | N13-C6 -C6_b -N13_b | -180.0(5) |
| N2 -N1 -C1 -N4   | 0.6(6)     | N16-C6 -C6_b -N16_b | 180.0(5)  |
| N1 -N2 -N3 -N4   | -1.2(6)    | N13-C6 -C6_b -N16_b | 2.6(7)    |
| N3 -N2 -C2 -N6   | 102.3(6)   | N1 -C1 -C1_a -N1_a  | -180.0(5) |

|                |          |                    |           |
|----------------|----------|--------------------|-----------|
| N3 -N2 -C2 -N5 | -87.0(7) | N1 -C1 -C1_a -N4_a | -0.8(8)   |
| C2 -N2 -N3 -N4 | 179.6(5) | N4 -C1 -C1_a -N1_a | 0.8(8)    |
| N1 -N2 -C2 -N5 | 93.8(6)  | N4 -C1 -C1_a -N4_a | -180.0(5) |
| N1 -N2 -C2 -N6 | -76.9(7) | N9 -C4 -C5 -N12    | -7.3(8)   |
| N2 -N3 -N4 -C1 | 1.4(5)   | N10-C4 -C5 -N12    | 171.4(5)  |
| N3 -N4 -C1 -N1 | -1.4(6)  |                    |           |

**Table S18.** Hydrogen bonds of **9**

| <b>D-H...A</b> | <b>d(D-H)/Å</b> | <b>d(H...A)/ Å</b> | <b>d(D...A)/ Å</b> | <b>&lt;(DHA)/°</b> |
|----------------|-----------------|--------------------|--------------------|--------------------|
| N7-H7A...O6    | 0.87            | 1.98               | 2.831(10)          | 166                |
| N7-H7B...O2    | 0.87            | 2.15               | 2.996(7)           | 163                |
| N8-H8...O1     | 0.87            | 2.31               | 3.013(6)           | 138                |
| N8-H8...O8     | 0.87            | 2.28               | 2.926(9)           | 131                |
| O9-H9A...N12   | 0.86            | 2.3                | 2.826(7)           | 120                |
| O9-H9B...O10   | 0.86            | 2.33               | 3.120(12)          | 152                |
| N11-H11A...O3  | 0.87            | 2.38               | 3.174(7)           | 152                |
| N11-H11B...O1  | 0.87            | 2.22               | 3.094(6)           | 175                |
| N12-H12A...O9  | 0.9             | 1.97               | 2.826(7)           | 158                |
| N12-H12B...O2  | 0.9             | 2.27               | 3.011(7)           | 139                |
| N12-H12B...O4  | 0.9             | 2.27               | 2.938(7)           | 131                |
| N12-H12C...O5  | 0.9             | 2.34               | 2.811(11)          | 112                |
| N12-H12C...N4  | 0.9             | 2.28               | 3.067(7)           | 145                |
| C5-H5A...N15   | 0.98            | 2.51               | 3.396(8)           | 150                |
| C5-H5B...O4    | 0.98            | 2.55               | 2.958(7)           | 105                |
| C8-H8A...O9    | 0.97            | 1.51               | 2.460(16)          | 167                |
| C8-H8B...O4    | 0.97            | 2.57               | 3.470(14)          | 155                |
| C8-H8B...N6    | 0.97            | 2.28               | 3.207(14)          | 159                |

Theoretical calculations were performed by using the Gaussian 09 (Revision E.01)

suite of programs. 错误!未找到引用源。 The elementary geometric optimization and the frequency analysis were performed at the level of the Becke three parameter, Lee-Yan-Parr (B3LYP) functional with the 6-311+G\*\* basis set.<sup>[1]</sup> All of the optimized structures were characterized to be local energy minima on the potential surface without any imaginary frequencies. Atomization energies were calculated by the CBS-4M. All the optimized structures were characterized to be true local energy minima on the potential-energy surface without imaginary frequencies.

The predictions of heat of formation (HOF) adopt the hybrid DFT-B3LYP methods with 6-311+G\*\* basis set via designed isodesmic reactions. The isodesmic reaction processes, i.e., the number of each kind of formal bond is conserved, are used with application of the bond separation reaction (BSR) rules. The molecule is broken down into a set of two heavy atom molecules containing the same component bonds. The isodesmic reactions used to derive the HOF of the title compounds are in Scheme S1. The change of enthalpy for the reactions at 298 K can be expressed as

$$\Delta H_{298} = \sum \Delta_f H_P - \sum \Delta_f H_R \quad (1)$$

Where  $\sum \Delta_f H_P$  and  $\sum \Delta_f H_R$  are the HOF of reactants and products at 298 K, respectively, and  $\Delta H_{298}$  can be calculated using the following expression:

$$\Delta H_{298} = \Delta E_{298} + \Delta(PV) = \Delta E_0 + \Delta ZPE + \Delta H_T + \Delta nRT \quad (2)$$

Where  $\Delta E_0$  is the change in total energy between the products and the reactants at 0 K;  $\Delta ZPE$  is the difference between the zero-point energies (ZPE) of the products and the reactants at 0 K;  $\Delta H_T$  is thermal correction from 0 to 298 K. The  $\Delta(PV)$  value in eq (2) is the PV work term. It equals  $\Delta(nRT)$  for the reactions of ideal gas. For the isodesmic reaction,  $\Delta n = 0$ , so  $\Delta(PV) = 0$ . On the left side of Eq. (1), apart from target compound, all the others are called reference compounds. The HOF of reference compounds is available from the experiments.

For energetic salts, the solid-phase heats of formation are calculated based on a Born-Haber energy cycle. The heat of formation of a salt can be simplified by the formula given in Equation (1):

$$\Delta H_f^0(\text{salt}, 298 \text{ K}) = \Delta H_f^0(\text{cation}, 298 \text{ K}) + \Delta H_f^0(\text{anion}, 298 \text{ K}) - \Delta H_L \quad (1)$$

Where  $\Delta H_L$  is the lattice energy of the salts, which could be predicted by using the formula suggested by Jenkins et al.<sup>[3]</sup> [Eq. (2)]

$$\Delta H_L = U_{\text{POT}} + [p(n_M/2 - 2) + q(n_X/2 - 2)]RT \quad (2)$$

where  $n_M$  and  $n_X$  depend on the nature of the ions,  $Mp^+$  and  $Xq^-$ , and are equal to 3 for monatomic ions, 5 for linear polyatomic ions, and 6 for nonlinear polyatomic ions. The



equation for lattice potential energy  $U_{\text{POT}}$  [Eq. (3)] has the form:

$$U_{\text{POT}} (\text{kJ}\cdot\text{mol}^{-1}) = \gamma (\rho_m/M_m)^{1/3} + \delta \quad (3)$$

Where  $\rho_m/\text{g cm}^{-3}$  is the density,  $M_m$  is the chemical formula mass of the ionic material, and values for the coefficients  $\gamma/\text{kJ mol}^{-1} \text{cm}$  and  $\delta/\text{kJ mol}^{-1}$  are taken from the literature.<sup>4,5</sup>

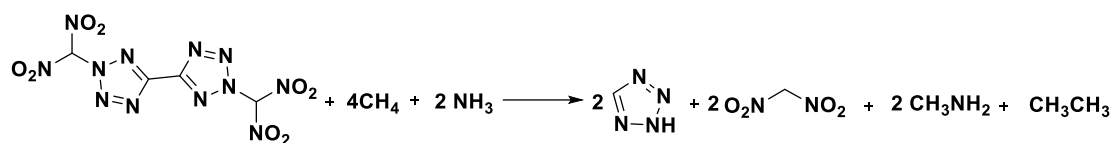

**Scheme S1.** Isodesmic reactions of neutral compounds.

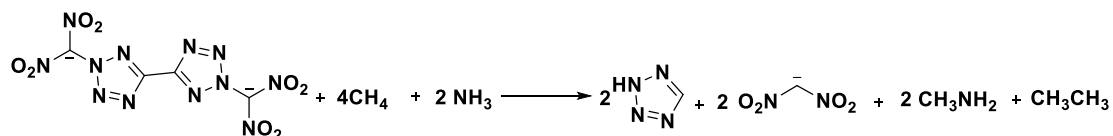

**Scheme S2.** Isodesmic reactions of ionic compounds.

**Table S19.** Ab initio computational values of small molecules used in isodesmic and tautomeric reactions.

| Compound                        | $E_0^a$  | ZPE <sup>b</sup> | $H_T^c$ | HOF <sup>d</sup> |
|---------------------------------|----------|------------------|---------|------------------|
| CH <sub>4</sub>                 | -40.53   | 112.26           | 10.04   | -74.6            |
| NH <sub>3</sub>                 | -56.58   | 86.27            | 10.05   | -45.9            |
| CH <sub>3</sub> NH <sub>2</sub> | -95.89   | 160.78           | 11.64   | -22.5            |
| CH <sub>3</sub> CH <sub>3</sub> | -79.86   | 187.31           | 11.79   | -84              |
|                                 | -258.32  | 117.69           | 11.84   | 334.3            |
|                                 | -449.61  | 132.90           | 14.71   | -25.61           |
|                                 | -449.08  | 100.12           | 18.42   | -232.98          |
|                                 | -1412.23 | 350.61           | 55.15   | 838.79           |
|                                 | -1411.16 | 286.52           | 53.52   | 437.86           |

<sup>a</sup>Total energy calculated by B3LYP/6-311+G\*\*method (a.u);

<sup>b</sup>Zero-point correction (kJ mol<sup>-1</sup>);

<sup>c</sup>Thermal correction to enthalpy (kJ mol<sup>-1</sup>);

<sup>d</sup>Heat of formation (kJ mol<sup>-1</sup>);

### 3.References

- [1] Frisch, M. J.; Trucks, G. W.; Schlegel, H. B.; Daniels, A. D.; Farkas, O.; Foresman, J. B.; Ortiz, J. V.; Cioslowski, J.; Fox, D. J. Gaussian 09, Revision ABCD. 2009, 0123, Gaussian. Inc. Wallingford CT.
- [2] Hariharan, P. C.; Pople, J. A.; Influence of Polarization Functions On MO Hydrogenation Energies. *Theor. Chim. Acta.* 1973, 28, 213-222.
- [3] Ochterski, J. W.; Petersson, G. A.; A Complete Basis Set Model Chemistry. V. Extensions to Six or More Heavy Atoms. *Montgomery JA, J. Chem. Phys.* 1996, 104, 2598-2619.
- [4] Jenkins, H. D.; Tudeal, D.; Glasser, L. Lattice Potential Energy Estimation for Complex Ionic Salts from Density Measurements. *Inorg. Chem.* 2002, 41, 2364-2367.
- [5] Jenkins, H. D.; Roobottom, H. K.; Passmore J, Glasser L. Relationships among Ionic Lattice Energies, Molecular (Formula Unit) Volumes, And Thermochemical Radii. *Inorg. Chem.* 1999, 38, 3609-3620.

## 4. $^1\text{H}$ and $^{13}\text{C}$ NMR Spectra of BDNBT and Compounds 1-10

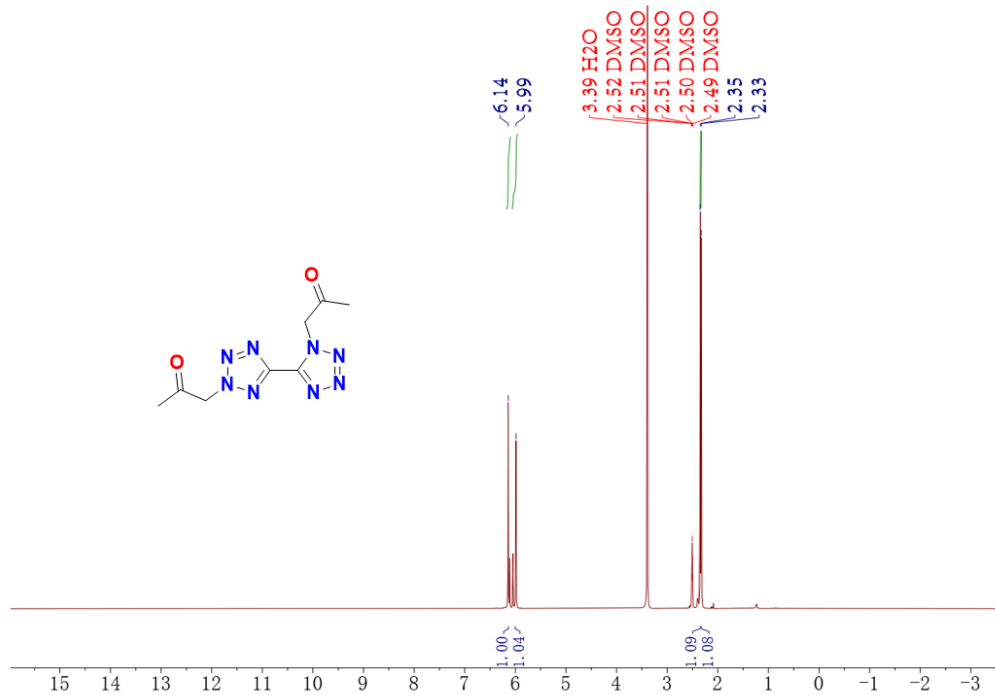

**Figure S11**  $^1\text{H}$  NMR spectra (300 MHz) of **1** in  $[\text{D}_6]$  DMSO at 25 °C.

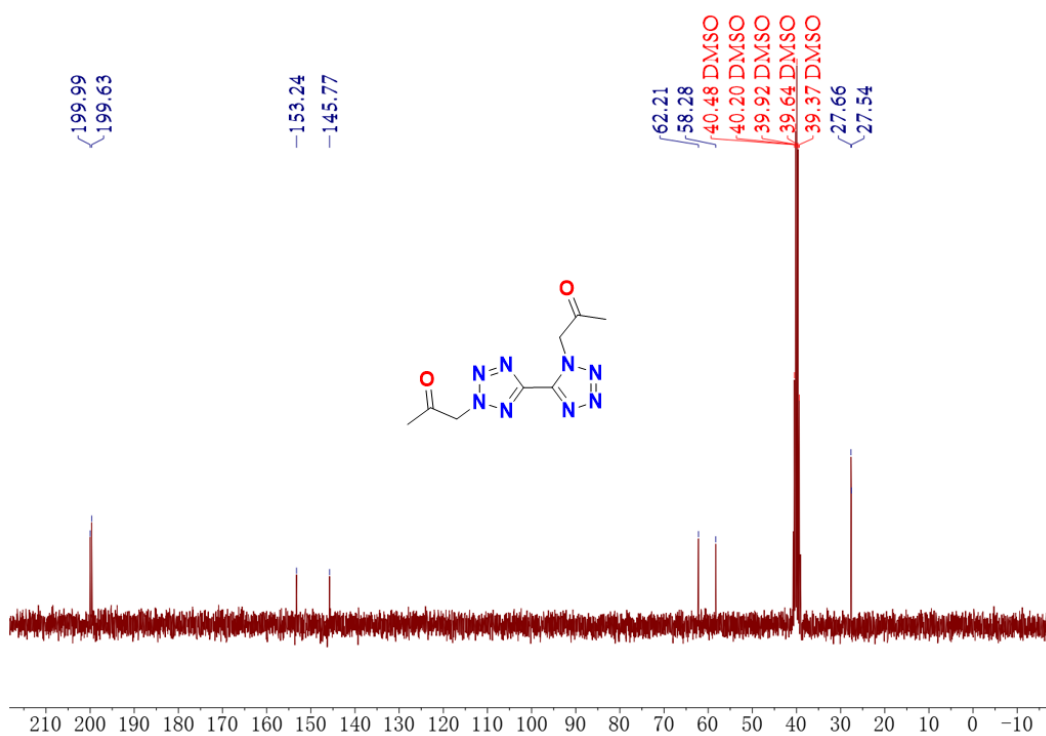

**Figure S12**  $^{13}\text{C}$  NMR spectra (75 MHz) of **1** in  $[\text{D}_6]$  DMSO at 25 °C.

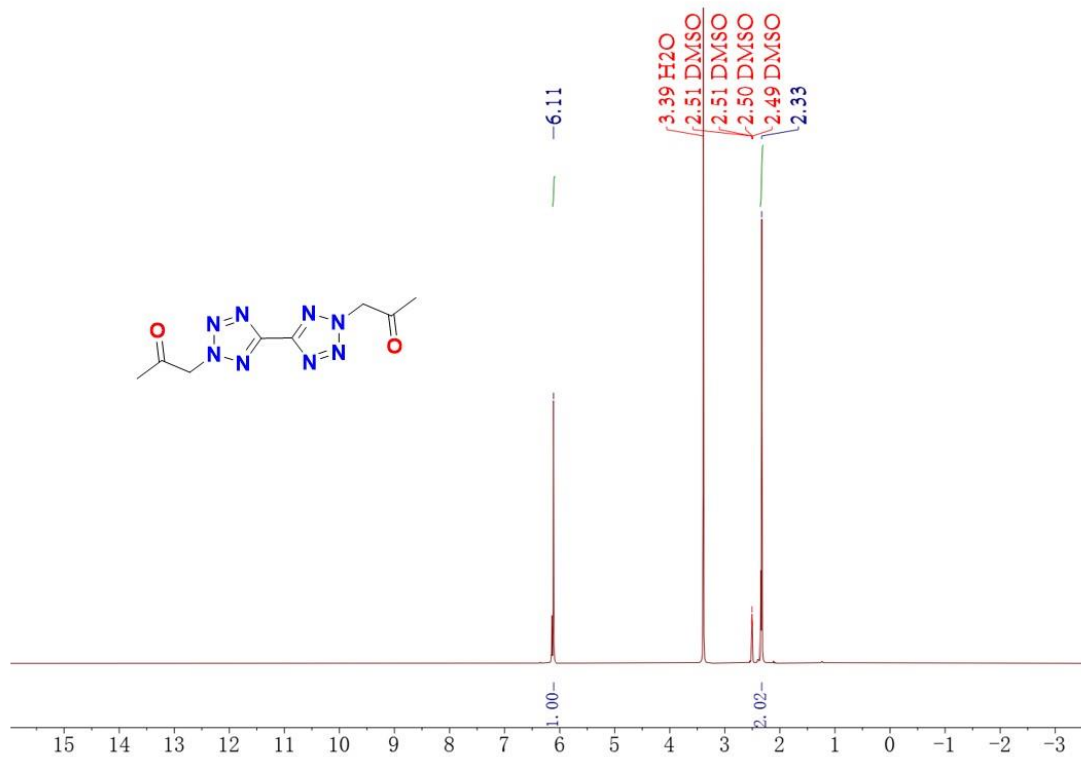

**Figure S13**  $^1\text{H}$  NMR spectra (300 MHz) of **2** in  $[\text{D}_6]$  DMSO at 25 °C.

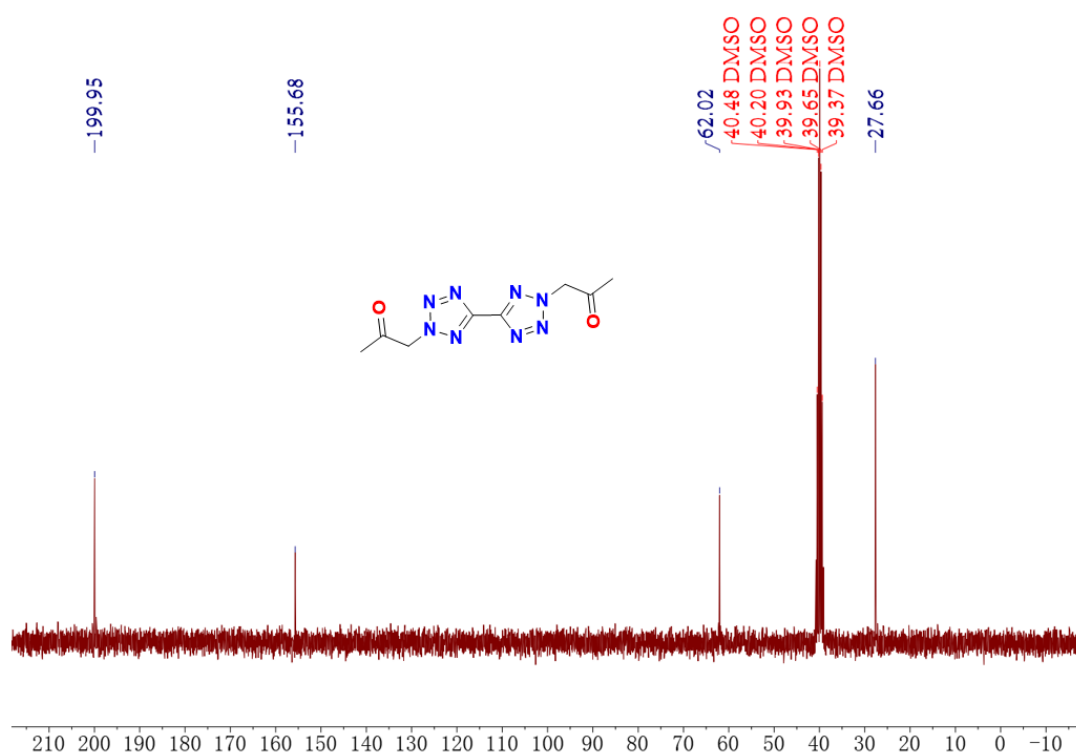

**Figure S14**  $^{13}\text{C}$  NMR spectra (75 MHz) of **2** in  $[\text{D}_6]$  DMSO at 25 °C.

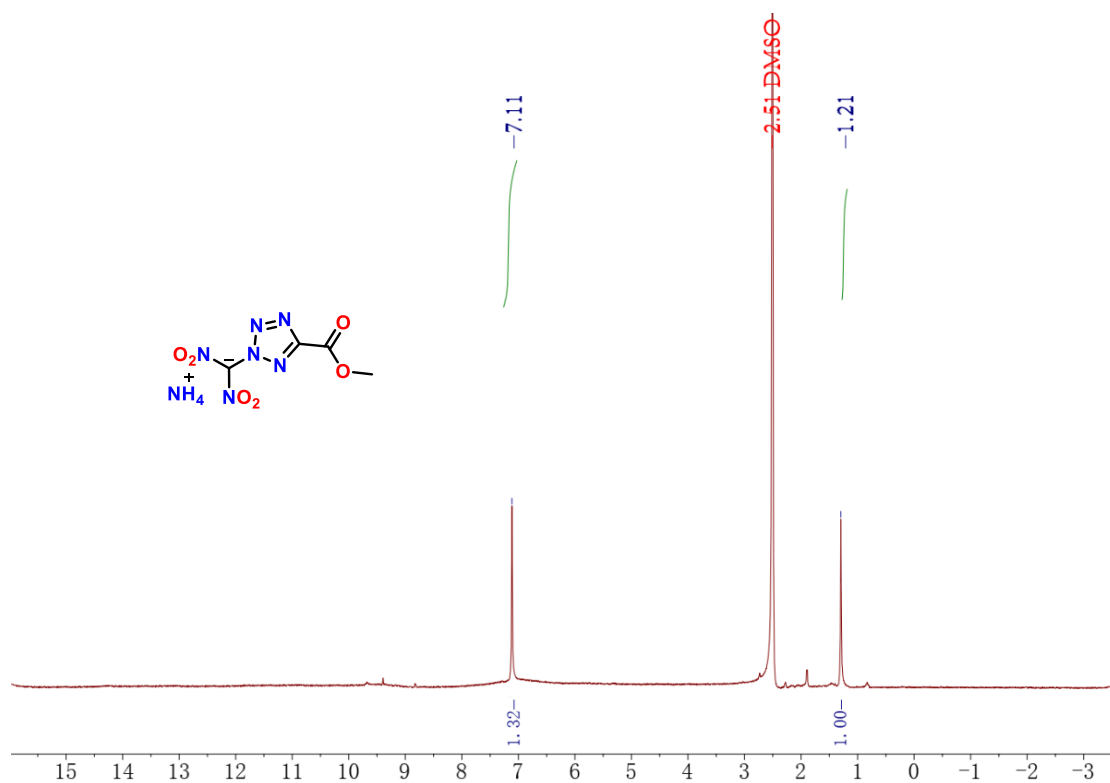

**Figure S15**  $^1\text{H}$  NMR spectra (300 MHz) of **3** in  $[\text{D}_6]$  DMSO at 25 °C.

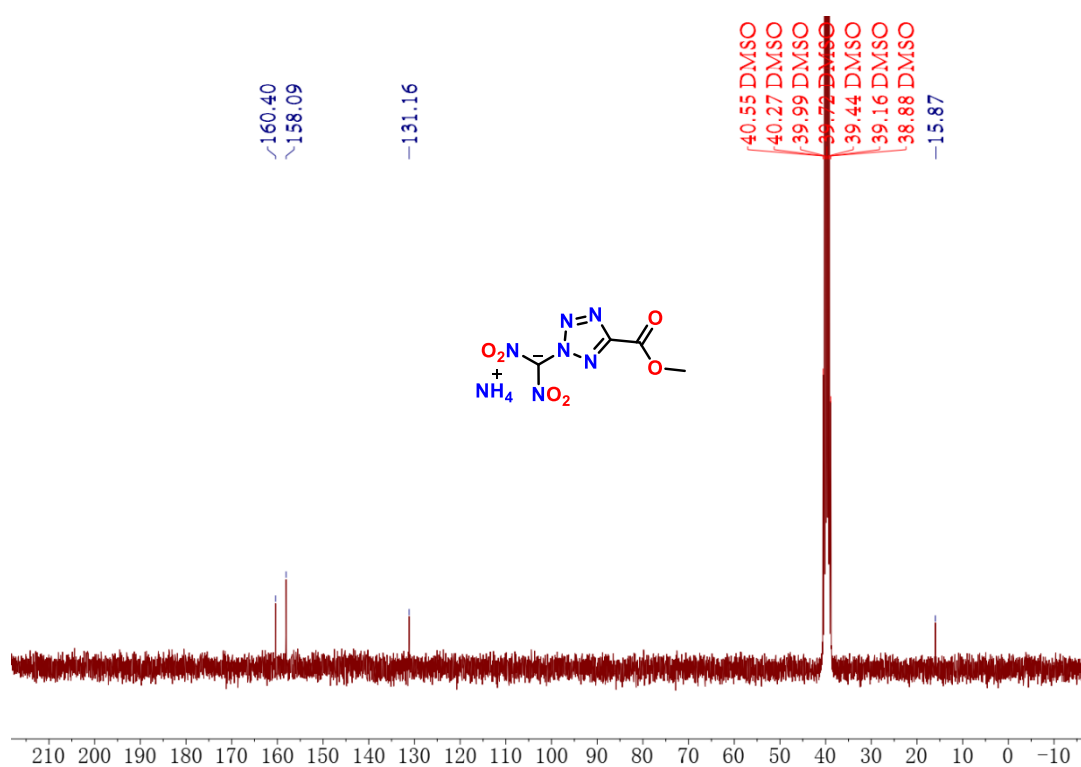

**Figure S16**  $^{13}\text{C}$  NMR spectra (75 MHz) of **3** in  $[\text{D}_6]$  DMSO at 25 °C.

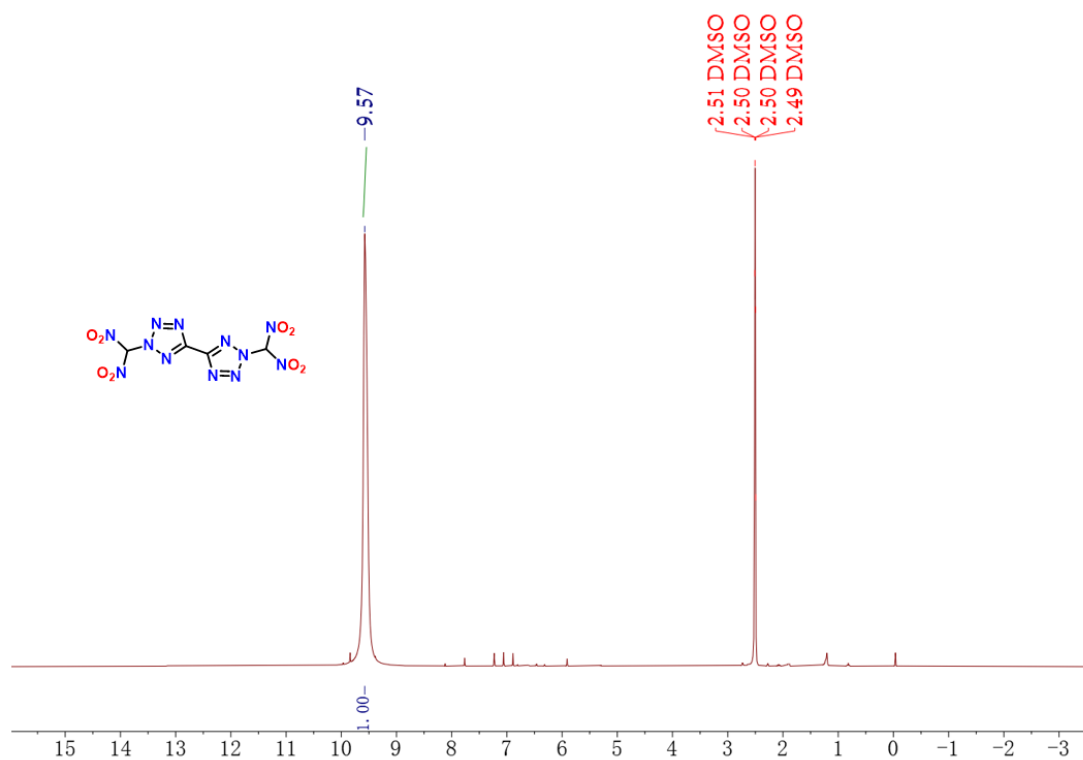

Figure S17  $^1\text{H}$  NMR spectra (300 MHz) of BDNBT in  $[\text{D}_6]$  DMSO at 25 °C.

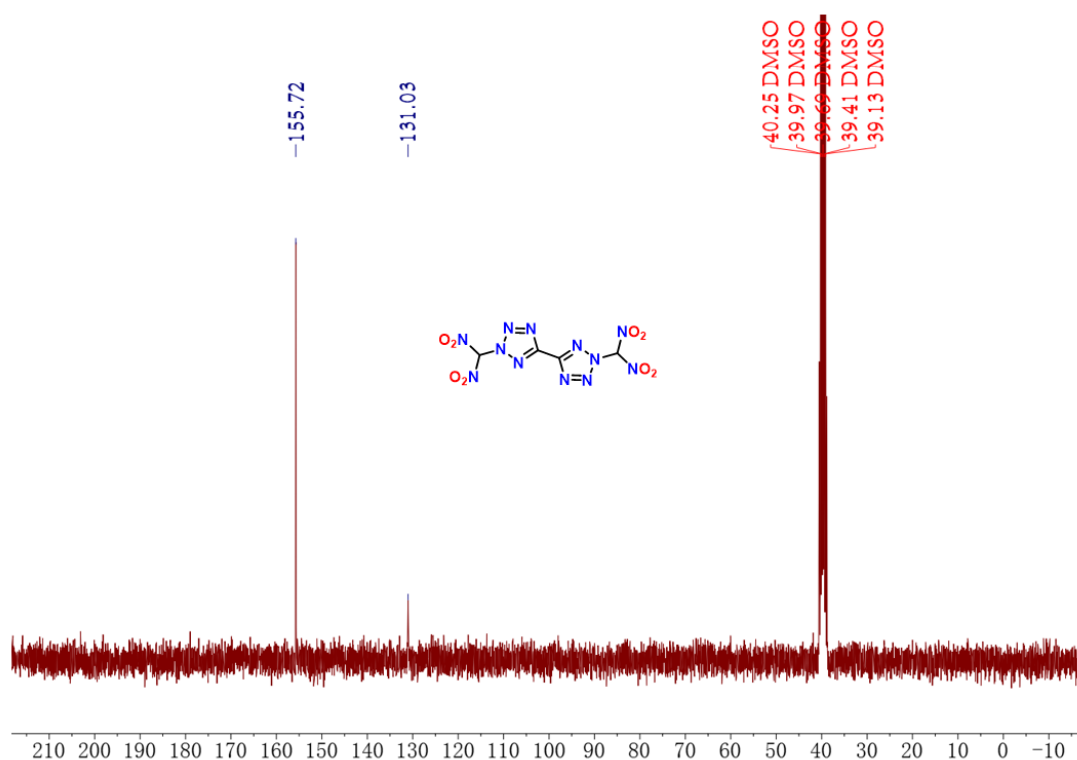

Figure S18  $^{13}\text{C}$  NMR spectra (75 MHz) of BDNBT in  $[\text{D}_6]$  DMSO at 25 °C.

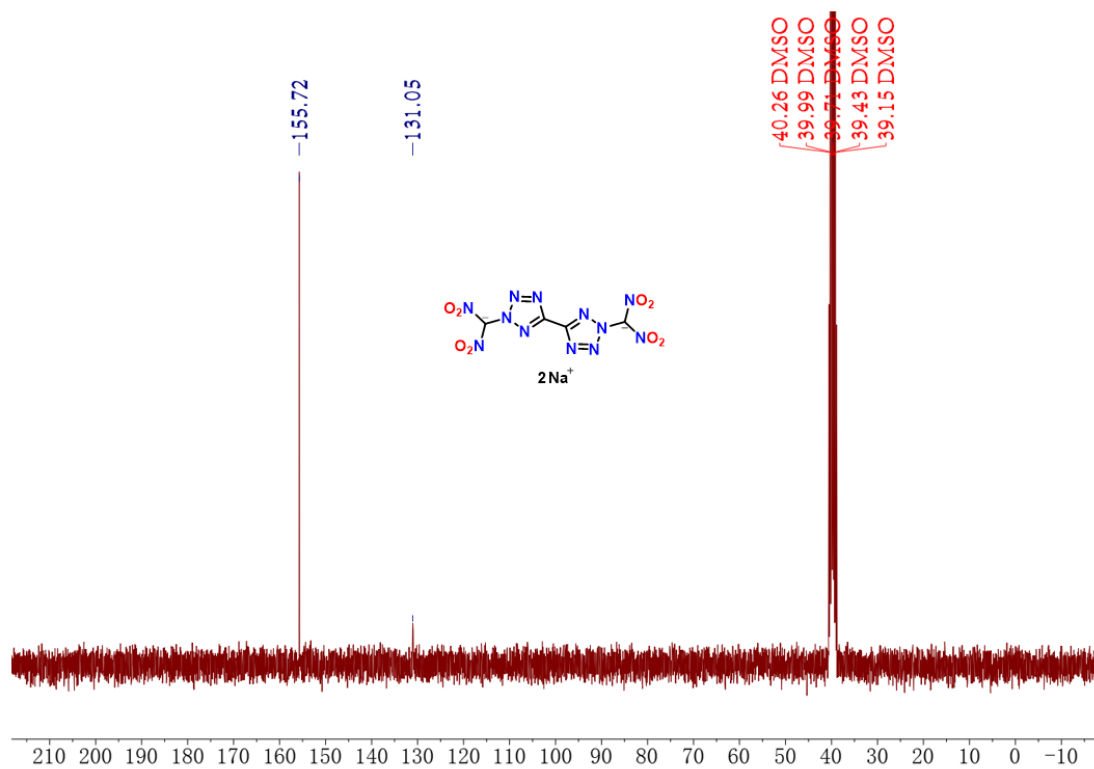

Figure S19  $^{13}\text{C}$  NMR spectra (75 MHz) of **4** in  $[\text{D}_6]$  DMSO at 25 °C.

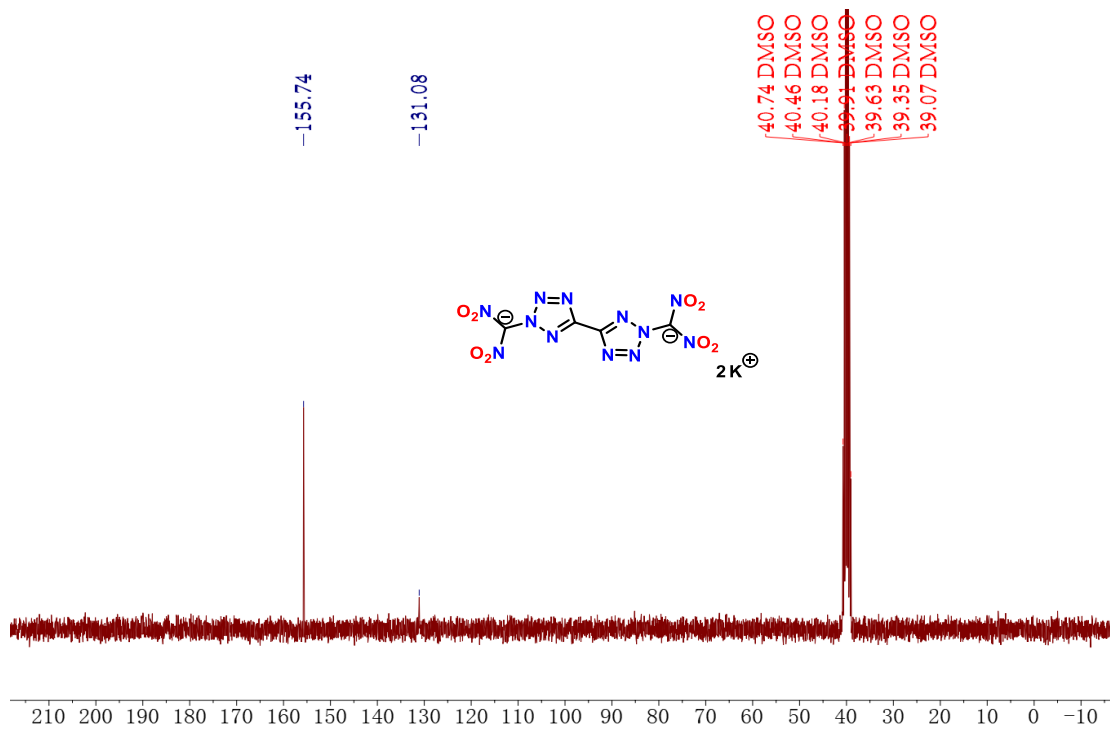

Figure S20  $^{13}\text{C}$  NMR spectra (75 MHz) of **5** in  $[\text{D}_6]$  DMSO at 25 °C.

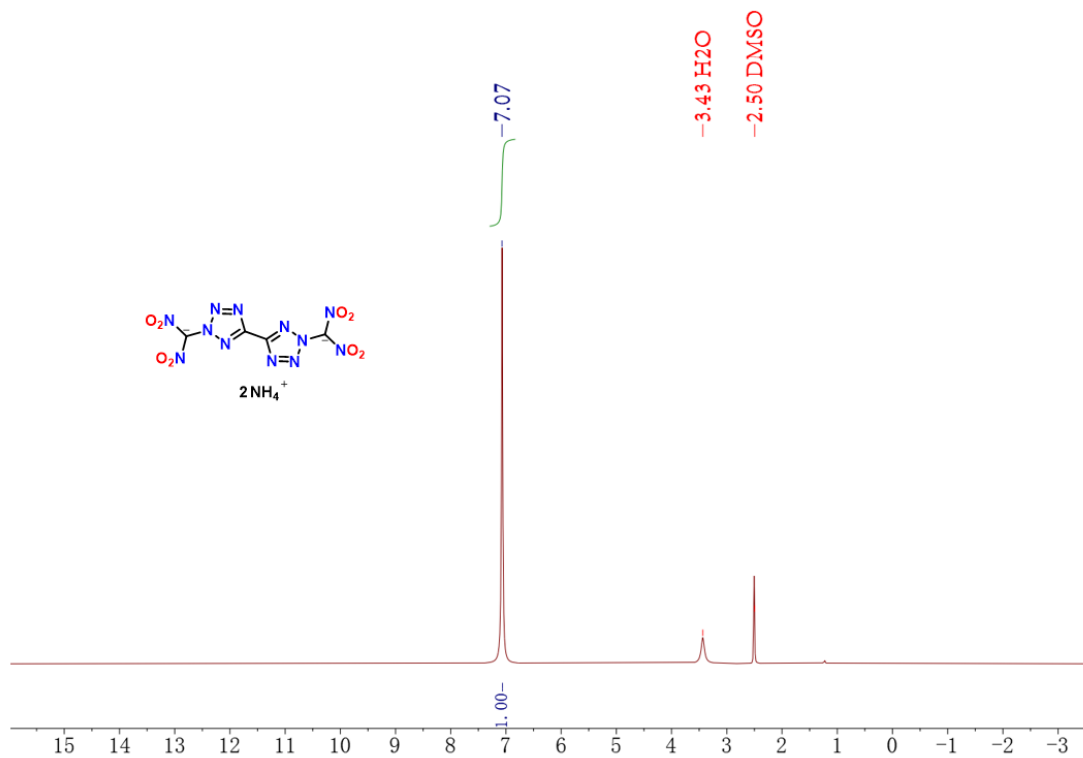

**Figure S21**  $^1\text{H}$  NMR spectra (300 MHz) of **6** in  $[\text{D}_6]$  DMSO at 25 °C.

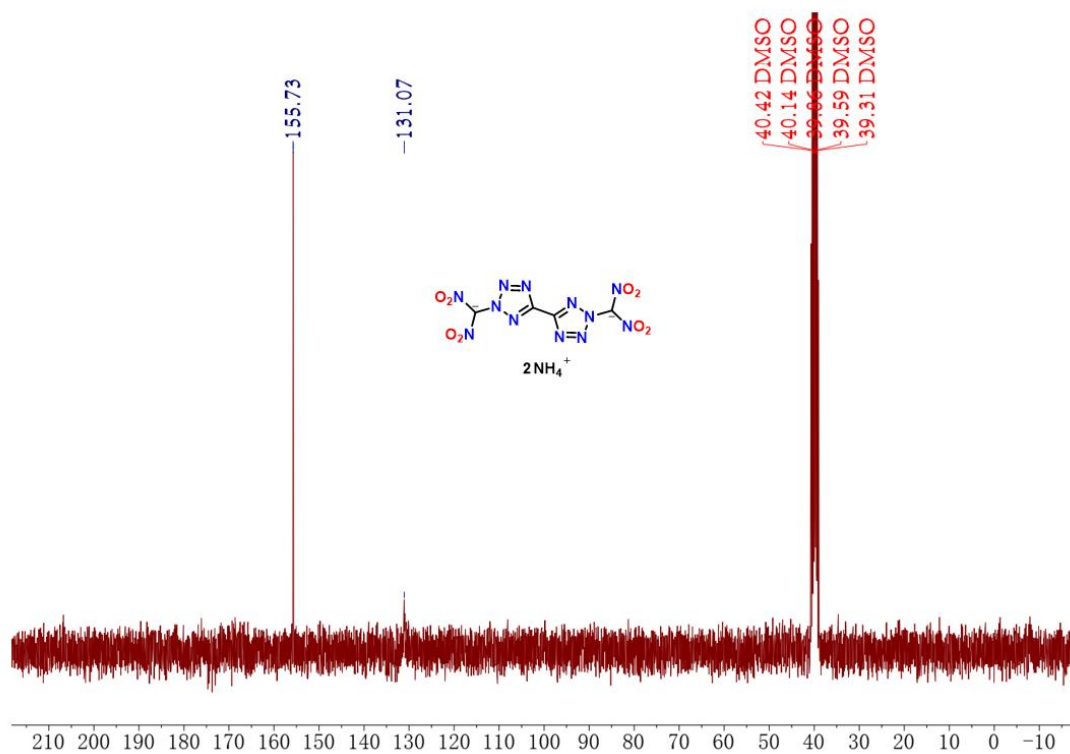

**Figure S22**  $^{13}\text{C}$  NMR spectra (75 MHz) of **6** in  $[\text{D}_6]$  DMSO at 25 °C.



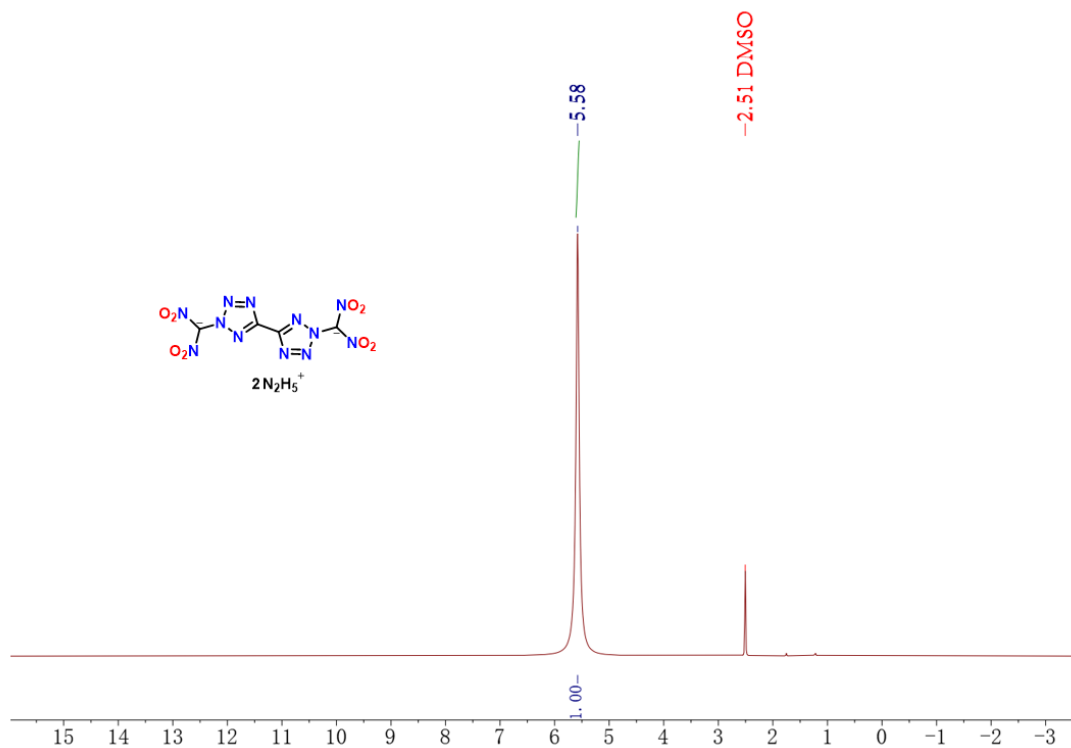

**Figure S23**  $^1\text{H}$  NMR spectra (300 MHz) of 7 in  $[\text{D}_6]$  DMSO at 25 °C.

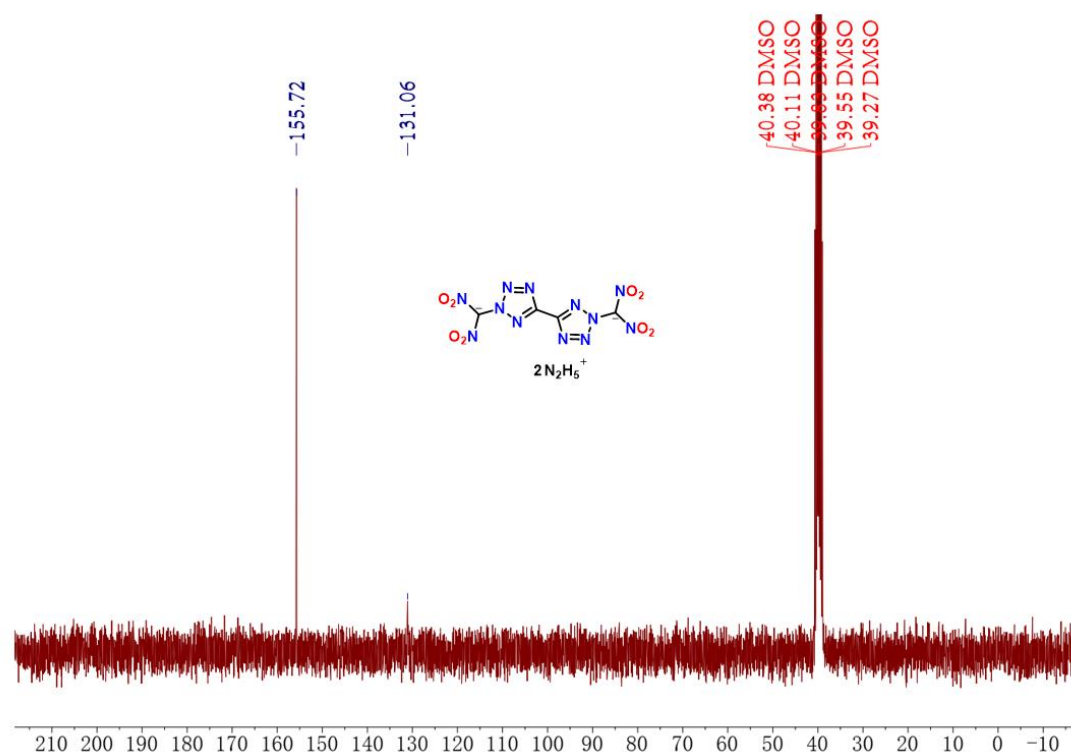

**Figure S24**  $^{13}\text{C}$  NMR spectra (75 MHz) of 7 in  $[\text{D}_6]$  DMSO at 25 °C.

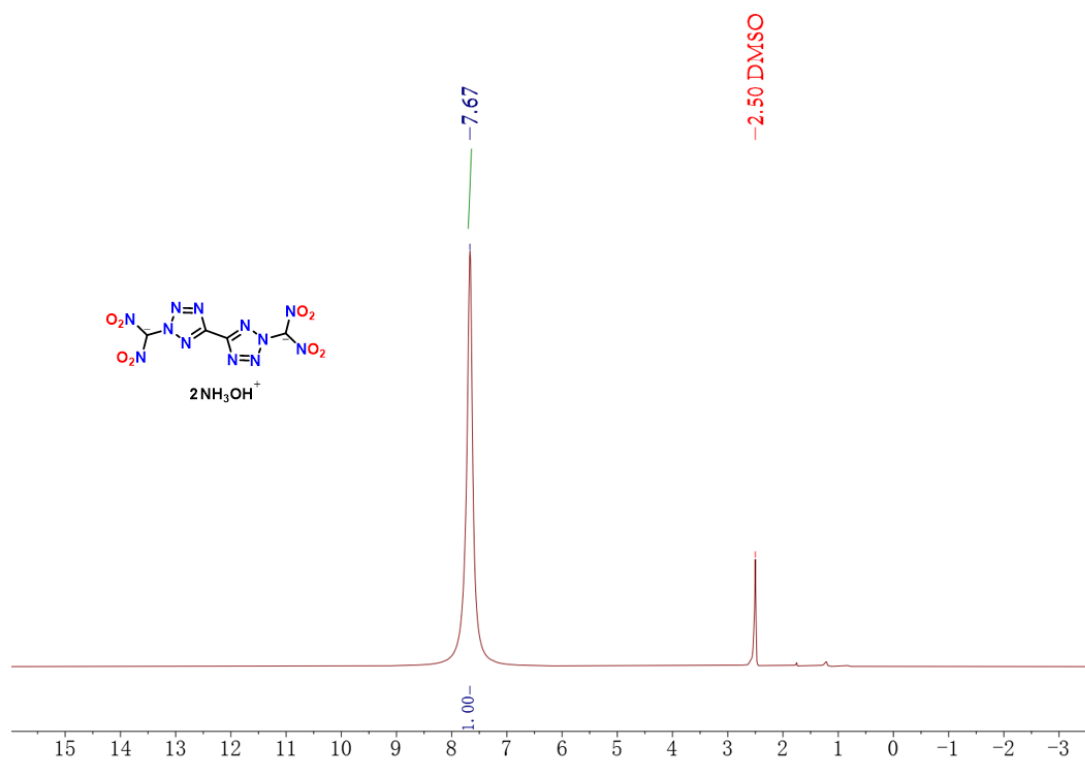

**Figure S25**  $^1\text{H NMR}$  spectra (300 MHz) of **8** in  $[\text{D}_6]$  DMSO at 25 °C.

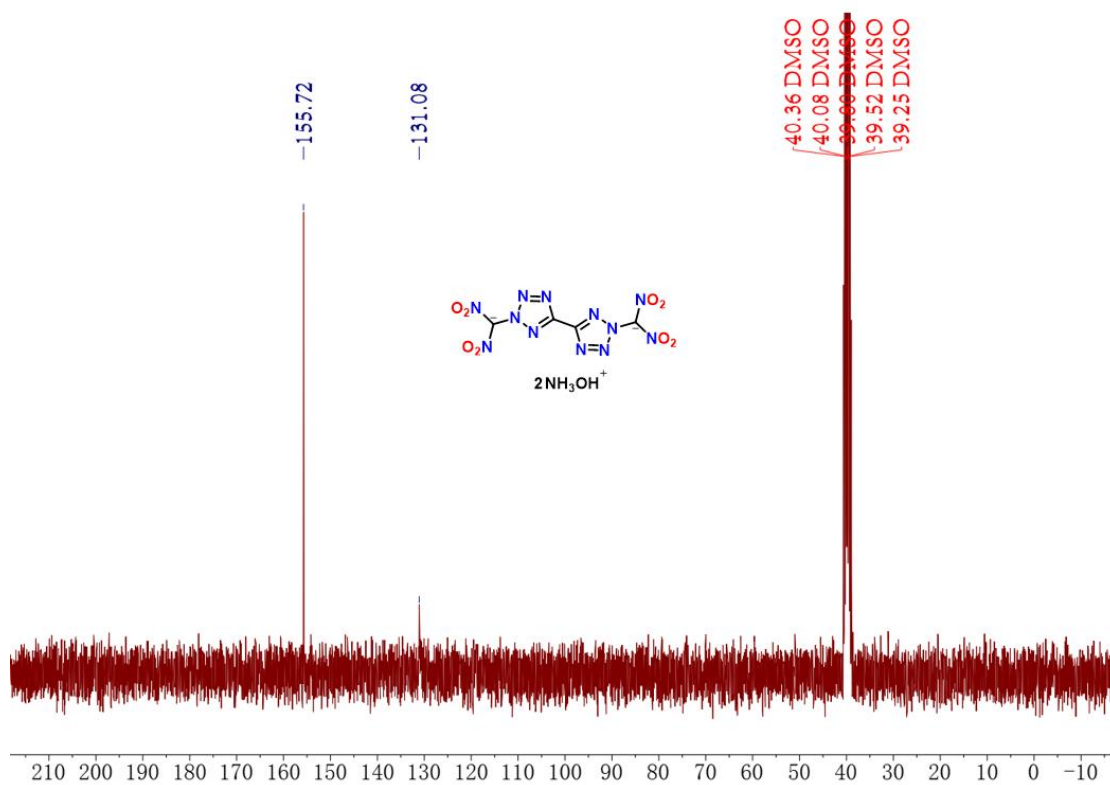

**Figure S26**  $^{13}\text{C NMR}$  spectra (75 MHz) of **8** in  $[\text{D}_6]$  DMSO at 25 °C.

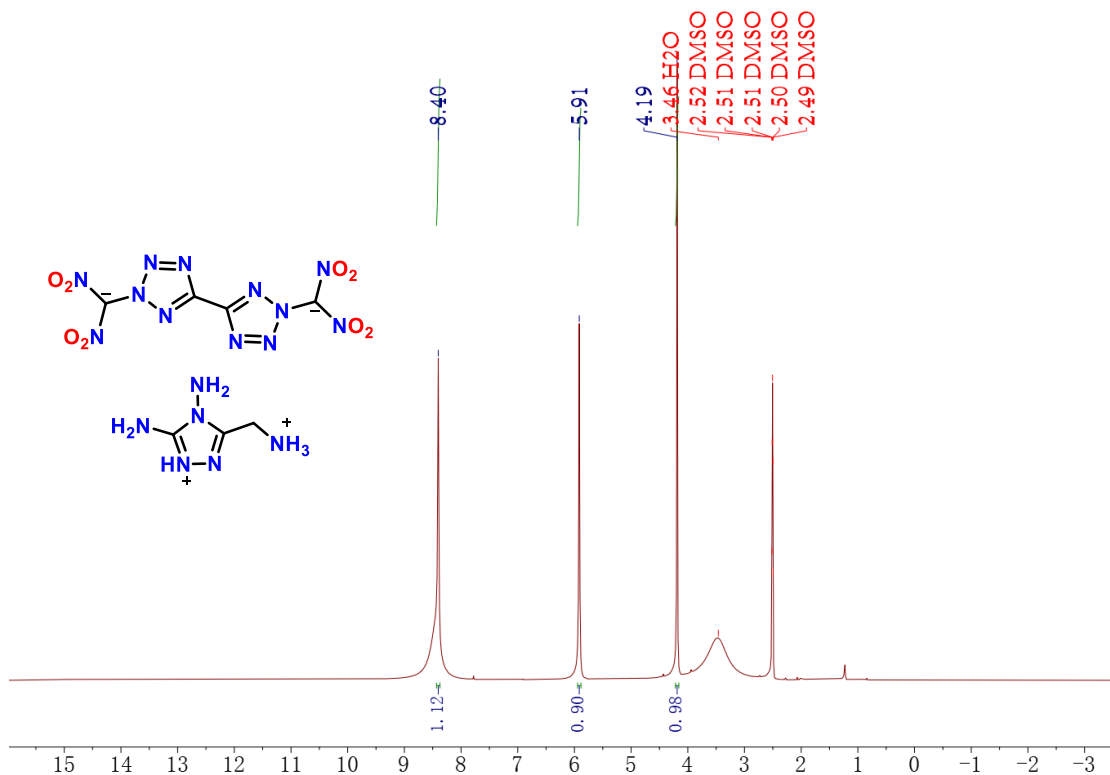

Figure S27  $^1\text{H}$  NMR spectra (300 MHz) of **9** in  $[\text{D}_6]$  DMSO at 25 °C.

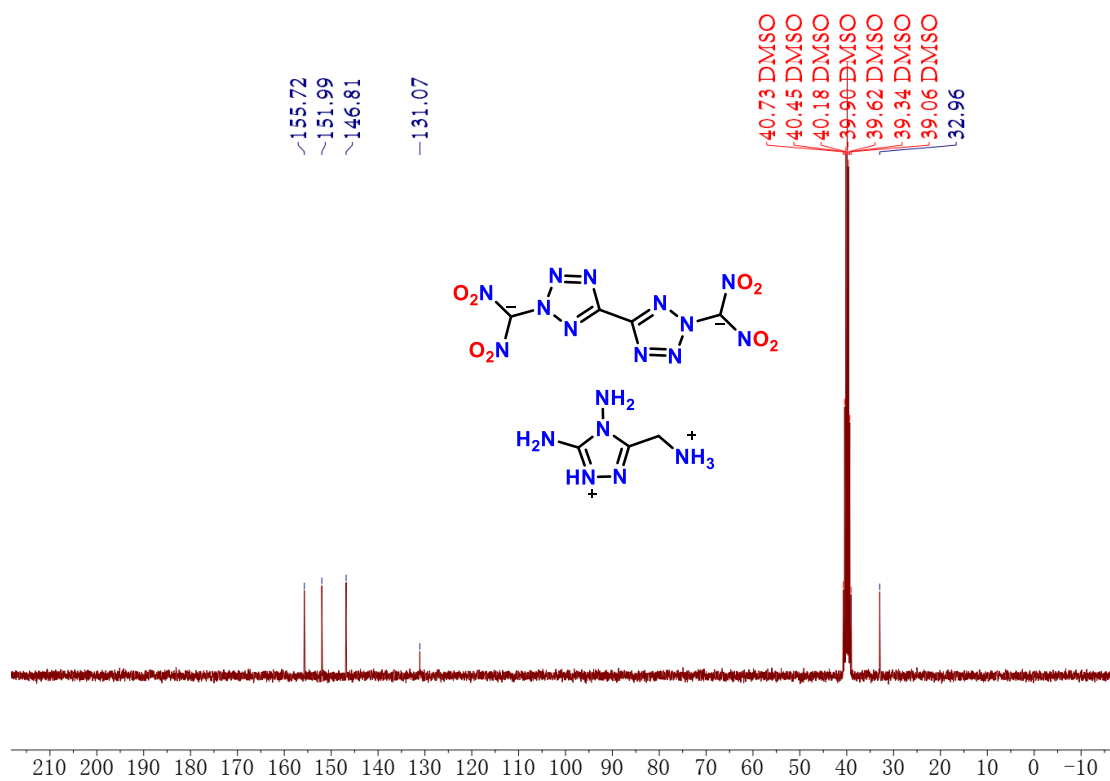

Figure S28  $^{13}\text{C}$  NMR spectra (75 MHz) of **9** in  $[\text{D}_6]$  DMSO at 25 °C.

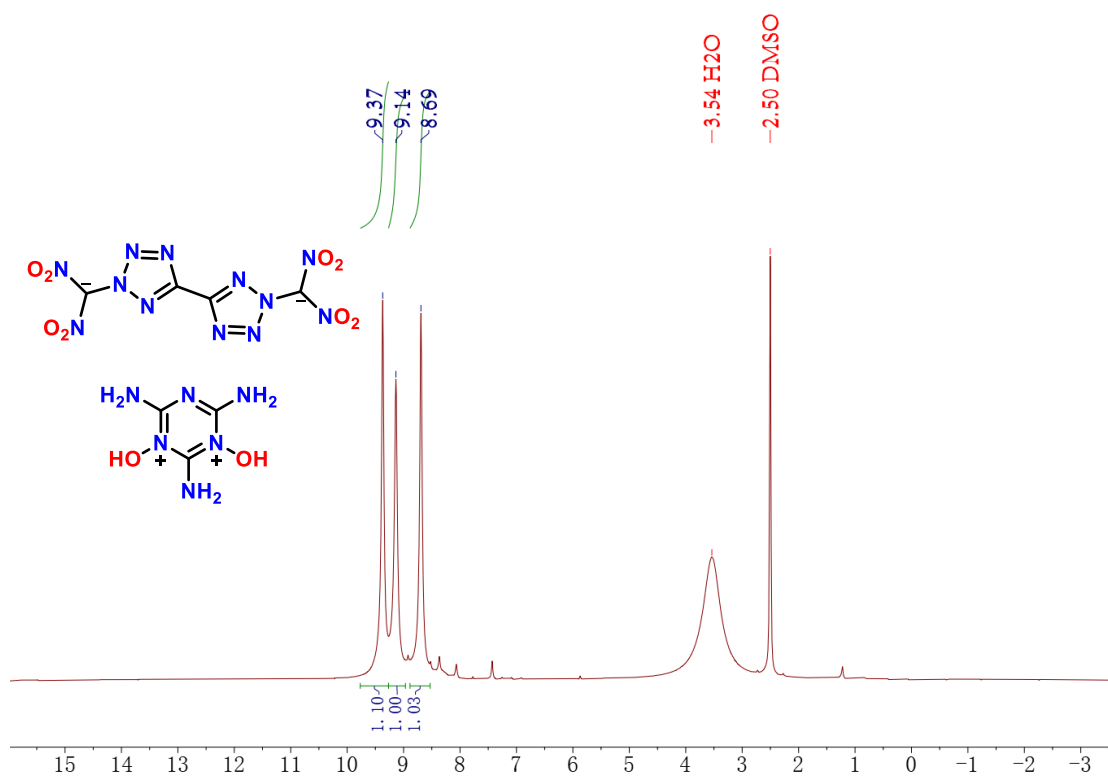

Figure S29 <sup>1</sup>H NMR spectra (300 MHz) of **10** in [D<sub>6</sub>] DMSO at 25 °C.

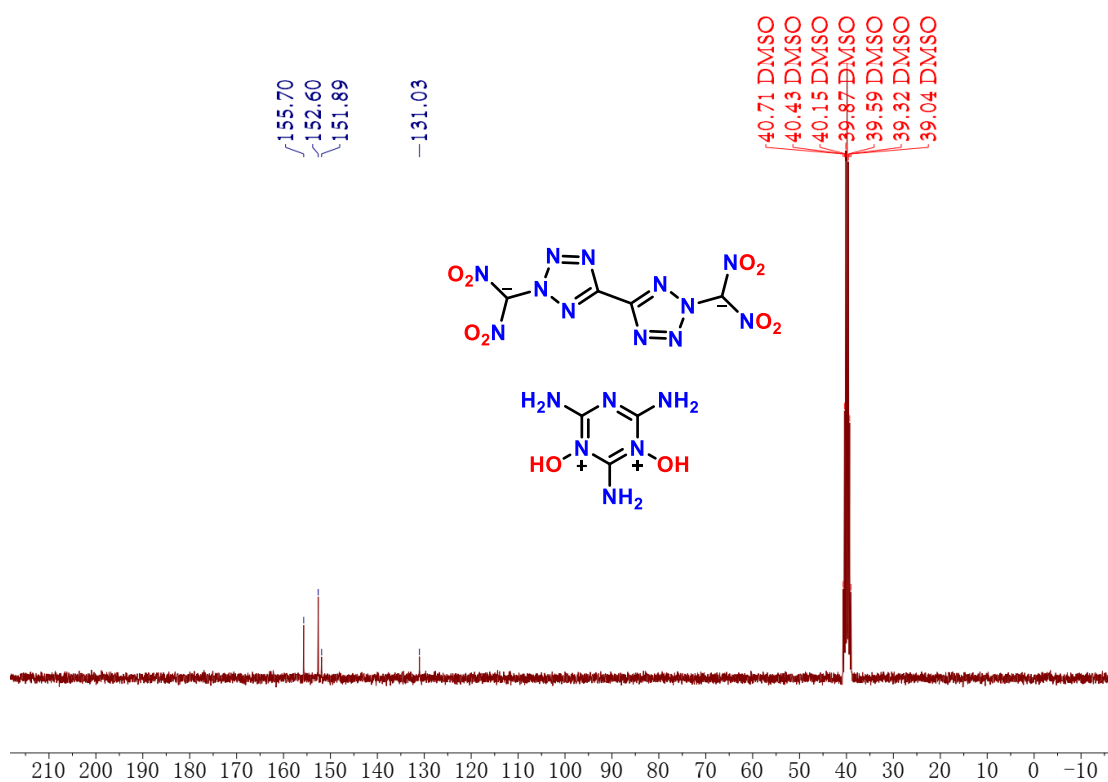

Figure S30 <sup>13</sup>C NMR spectra (75 MHz) of **10** in [D<sub>6</sub>] DMSO at 25 °C.
